# Supplementary material for: The long noncoding RNA FRILAIR regulates strawberry fruit ripening by functioning as a noncanonical target mimic
Source: PLoS Genet. 2021 Mar 19;17(3):e1009461. doi: 10.1371/journal.pgen.1009461 (PMC8011760; doi:10.1371/journal.pgen.1009461)
Supplement: S2 Table — (XLSX) [file pgen.1009461.s024.xlsx]

## Sheet: lncRNA_statistics
S2 Table
LncRNA id	LncRNA transcript id	LncRNA gene id	LncRNA type	Number of exons	Length of lncRNAs	GC content (%)
lncRNA00021	TCONS_00000021	LINC.XLOC_000021	LINC	1	1256	36.23
lncRNA00023	TCONS_00000023	LINC.XLOC_000023	LINC	1	1062	38.51
lncRNA00044	TCONS_00000044	LINC.XLOC_000044	LINC	1	973	33.4
lncRNA00051	TCONS_00000051	LINC.XLOC_000051	LINC	1	1426	34.29
lncRNA00052	TCONS_00000052	LINC.XLOC_000052	LINC	1	885	37.4
lncRNA00059	TCONS_00000059	LINC.XLOC_000059	LINC	1	528	32.77
lncRNA00070	TCONS_00000070	LINC.XLOC_000070	LINC	1	723	33.2
lncRNA00073	TCONS_00000073	LINC.XLOC_000073	LINC	1	2094	41.98
lncRNA00076	TCONS_00000076	LINC.XLOC_000076	LINC	2	2302	35.4
lncRNA00082	TCONS_00000082	LINC.XLOC_000082	LINC	1	1320	46.14
lncRNA00083	TCONS_00000083	LINC.XLOC_000083	LINC	1	2133	36.66
lncRNA00086	TCONS_00000086	LINC.XLOC_000086	LINC	1	1907	39.96
lncRNA00087	TCONS_00000087	LINC.XLOC_000087	LINC	1	1302	39.71
lncRNA00088	TCONS_00000088	LINC.XLOC_000088	LINC	1	987	35.76
lncRNA00089	TCONS_00000089	LINC.XLOC_000089	LINC	1	454	35.02
lncRNA00092	TCONS_00000092	LINC.XLOC_000092	LINC	2	1693	39.69
lncRNA00093	TCONS_00000093	LINC.XLOC_000093	LINC	1	1835	39.46
lncRNA00096	TCONS_00000096	LINC.XLOC_000096	LINC	1	1121	37.64
lncRNA00097	TCONS_00000097	LINC.XLOC_000097	LINC	2	3044	36.24
lncRNA00098	TCONS_00000098	LINC.XLOC_000098	LINC	1	2212	37.43
lncRNA00099	TCONS_00000099	LINC.XLOC_000099	LINC	1	781	28.3
lncRNA00102	TCONS_00000102	LINC.XLOC_000102	LINC	1	456	35.96
lncRNA00108	TCONS_00000108	LINC.XLOC_000108	LINC	1	1556	39.27
lncRNA00111	TCONS_00000111	LINC.XLOC_000111	LINC	1	587	40.72
lncRNA00112	TCONS_00000112	LINC.XLOC_000112	LINC	1	1138	37.26
lncRNA00114	TCONS_00000114	LINC.XLOC_000114	LINC	1	1235	39.51
lncRNA00118	TCONS_00000118	LINC.XLOC_000118	LINC	1	967	37.33
lncRNA00124	TCONS_00000124	LINC.XLOC_000124	LINC	1	657	33.49
lncRNA00125	TCONS_00000125	LINC.XLOC_000125	LINC	1	1496	42.91
lncRNA00135	TCONS_00000135	LINC.XLOC_000135	LINC	1	2185	39.86
lncRNA00143	TCONS_00000143	LINC.XLOC_000142	LINC	1	562	32.92
lncRNA00147	TCONS_00000147	LINC.XLOC_000146	LINC	1	1237	33.39
lncRNA00149	TCONS_00000149	LINC.XLOC_000148	LINC	1	1944	34.52
lncRNA00155	TCONS_00000155	LINC.XLOC_000154	LINC	1	1290	36.98
lncRNA00162	TCONS_00000162	LINC.XLOC_000161	LINC	1	1986	39.38
lncRNA00167	TCONS_00000167	LINC.XLOC_000166	LINC	1	1316	33.59
lncRNA00168	TCONS_00000168	LINC.XLOC_000167	LINC	1	3059	32.56
lncRNA00169	TCONS_00000169	LINC.XLOC_000168	LINC	1	3078	35.71
lncRNA00173	TCONS_00000173	LINC.XLOC_000172	LINC	2	2206	35.09
lncRNA00175	TCONS_00000175	LINC.XLOC_000174	LINC	1	2059	39.24
lncRNA00177	TCONS_00000177	LINC.XLOC_000176	LINC	1	1077	40.85
lncRNA00178	TCONS_00000178	LINC.XLOC_000177	LINC	1	1370	35.11
lncRNA00181	TCONS_00000181	LINC.XLOC_000180	LINC	1	955	30.16
lncRNA00186	TCONS_00000186	LINC.XLOC_000185	LINC	1	2586	36.19
lncRNA00187	TCONS_00000187	LINC.XLOC_000186	LINC	1	744	32.66
lncRNA00188	TCONS_00000188	LINC.XLOC_000187	LINC	1	5099	41.03
lncRNA00191	TCONS_00000191	LINC.XLOC_000190	LINC	1	1506	39.04
lncRNA00195	TCONS_00000195	LINC.XLOC_000194	LINC	1	2211	34.55
lncRNA00196	TCONS_00000196	LINC.XLOC_000195	LINC	1	4210	37.46
lncRNA00198	TCONS_00000198	LINC.XLOC_000197	LINC	1	848	39.03
lncRNA00199	TCONS_00000199	LINC.XLOC_000198	LINC	1	1548	36.11
lncRNA00201	TCONS_00000201	LINC.XLOC_000200	LINC	1	1271	45.4
lncRNA00202	TCONS_00000202	LINC.XLOC_000201	LINC	1	1150	42.17
lncRNA00215	TCONS_00000215	LINC.XLOC_000214	LINC	1	714	33.61
lncRNA00219	TCONS_00000219	LINC.XLOC_000218	LINC	1	547	38.39
lncRNA00220	TCONS_00000220	LINC.XLOC_000219	LINC	1	1555	30.93
lncRNA00231	TCONS_00000231	LINC.XLOC_000230	LINC	1	1229	35.56
lncRNA00237	TCONS_00000237	LINC.XLOC_000236	LINC	1	1621	37.01
lncRNA00238	TCONS_00000238	LINC.XLOC_000237	LINC	1	2200	40.41
lncRNA00239	TCONS_00000239	LINC.XLOC_000238	LINC	1	557	27.11
lncRNA00243	TCONS_00000243	LINC.XLOC_000242	LINC	1	702	31.77
lncRNA00247	TCONS_00000247	LINC.XLOC_000246	LINC	1	1691	36.96
lncRNA00251	TCONS_00000251	LINC.XLOC_000249	LINC	1	1901	38.09
lncRNA00254	TCONS_00000254	LINC.XLOC_000251	LINC	2	2635	38.06
lncRNA00253	TCONS_00000253	LINC.XLOC_000251	LINC	1	4438	36.68
lncRNA00261	TCONS_00000261	LINC.XLOC_000258	LINC	1	1065	35.12
lncRNA00265	TCONS_00000265	LINC.XLOC_000262	LINC	1	768	30.73
lncRNA00268	TCONS_00000268	LINC.XLOC_000265	LINC	1	815	33.13
lncRNA00273	TCONS_00000273	LINC.XLOC_000270	LINC	1	1257	34.53
lncRNA00274	TCONS_00000274	LINC.XLOC_000271	LINC	1	2485	38.91
lncRNA00275	TCONS_00000275	LINC.XLOC_000272	LINC	1	845	37.4
lncRNA00282	TCONS_00000282	LINC.XLOC_000279	LINC	1	874	38.44
lncRNA00283	TCONS_00000283	LINC.XLOC_000280	LINC	1	1375	37.45
lncRNA00284	TCONS_00000284	LINC.XLOC_000281	LINC	1	2145	39.91
lncRNA00285	TCONS_00000285	LINC.XLOC_000282	LINC	1	1567	31.21
lncRNA00286	TCONS_00000286	LINC.XLOC_000283	LINC	1	1236	37.14
lncRNA00294	TCONS_00000294	LINC.XLOC_000291	LINC	1	1025	39.32
lncRNA00299	TCONS_00000299	LINC.XLOC_000296	LINC	1	2306	36.25
lncRNA00301	TCONS_00000301	LINC.XLOC_000298	LINC	1	1070	40.19
lncRNA00302	TCONS_00000302	LINC.XLOC_000299	LINC	1	1689	37.6
lncRNA00303	TCONS_00000303	LINC.XLOC_000300	LINC	1	1173	34.53
lncRNA00306	TCONS_00000306	LINC.XLOC_000303	LINC	1	1414	37.27
lncRNA00312	TCONS_00000312	LINC.XLOC_000309	LINC	1	803	40.47
lncRNA00318	TCONS_00000318	LINC.XLOC_000315	LINC	1	1060	32.55
lncRNA00320	TCONS_00000320	LINC.XLOC_000317	LINC	1	3426	37.42
lncRNA00338	TCONS_00000338	LINC.XLOC_000335	LINC	1	1223	38.68
lncRNA00339	TCONS_00000339	LINC.XLOC_000336	LINC	1	1650	39.52
lncRNA00340	TCONS_00000340	LINC.XLOC_000337	LINC	1	1648	36.83
lncRNA00344	TCONS_00000344	LINC.XLOC_000341	LINC	1	3750	50.99
lncRNA00345	TCONS_00000345	LINC.XLOC_000342	LINC	1	1181	36.49
lncRNA00348	TCONS_00000348	LINC.XLOC_000345	LINC	1	786	32.44
lncRNA00349	TCONS_00000349	LINC.XLOC_000346	LINC	1	650	30.77
lncRNA00350	TCONS_00000350	LINC.XLOC_000347	LINC	1	2213	39.36
lncRNA00351	TCONS_00000351	LINC.XLOC_000348	LINC	1	542	33.58
lncRNA00353	TCONS_00000353	LINC.XLOC_000350	LINC	1	4873	37.53
lncRNA00357	TCONS_00000357	LINC.XLOC_000354	LINC	1	3833	39.13
lncRNA00358	TCONS_00000358	LINC.XLOC_000355	LINC	1	1621	34.73
lncRNA00367	TCONS_00000367	LINC.XLOC_000364	LINC	1	1293	41.76
lncRNA00368	TCONS_00000368	LINC.XLOC_000365	LINC	1	1335	36.7
lncRNA00371	TCONS_00000371	LINC.XLOC_000368	LINC	1	1265	37.55
lncRNA00372	TCONS_00000372	LINC.XLOC_000369	LINC	1	1389	36.5
lncRNA00373	TCONS_00000373	LINC.XLOC_000370	LINC	1	1276	35.42
lncRNA00389	TCONS_00000389	LINC.XLOC_000386	LINC	1	2167	36.41
lncRNA00392	TCONS_00000392	LINC.XLOC_000389	LINC	1	443	30.7
lncRNA00398	TCONS_00000398	LINC.XLOC_000395	LINC	1	417	36.93
lncRNA00399	TCONS_00000399	LINC.XLOC_000396	LINC	1	406	31.03
lncRNA00401	TCONS_00000401	LINC.XLOC_000398	LINC	1	447	35.35
lncRNA00408	TCONS_00000408	LINC.XLOC_000405	LINC	1	519	41.23
lncRNA00418	TCONS_00000418	LINC.XLOC_000415	LINC	1	2412	38.27
lncRNA00429	TCONS_00000429	LINC.XLOC_000425	LINC	3	1058	36.96
lncRNA00428	TCONS_00000428	LINC.XLOC_000425	LINC	3	1062	37.01
lncRNA00431	TCONS_00000431	LINC.XLOC_000427	LINC	1	937	42.58
lncRNA00438	TCONS_00000438	LINC.XLOC_000434	LINC	1	1218	34.81
lncRNA00440	TCONS_00000440	LINC.XLOC_000436	LINC	1	1854	35.22
lncRNA00441	TCONS_00000441	LINC.XLOC_000437	LINC	1	2099	34.3
lncRNA00442	TCONS_00000442	LINC.XLOC_000438	LINC	1	1701	39.56
lncRNA00445	TCONS_00000445	LINC.XLOC_000441	LINC	1	3311	37.96
lncRNA00451	TCONS_00000451	LINC.XLOC_000447	LINC	1	793	34.05
lncRNA00454	TCONS_00000454	LINC.XLOC_000450	LINC	1	242	42.98
lncRNA00456	TCONS_00000456	LINC.XLOC_000452	LINC	1	1776	39.19
lncRNA00462	TCONS_00000462	LINC.XLOC_000458	LINC	1	1694	38.31
lncRNA00463	TCONS_00000463	LINC.XLOC_000459	LINC	1	1610	38.32
lncRNA00466	TCONS_00000466	LINC.XLOC_000462	LINC	1	1030	36.31
lncRNA00468	TCONS_00000468	LINC.XLOC_000464	LINC	1	1537	34.42
lncRNA00469	TCONS_00000469	LINC.XLOC_000465	LINC	1	3723	38.84
lncRNA00473	TCONS_00000473	LINC.XLOC_000469	LINC	1	1379	34.45
lncRNA00477	TCONS_00000477	LINC.XLOC_000473	LINC	1	1660	43.07
lncRNA00478	TCONS_00000478	LINC.XLOC_000474	LINC	1	1005	33.23
lncRNA00479	TCONS_00000479	LINC.XLOC_000475	LINC	1	4336	37.22
lncRNA00482	TCONS_00000482	LINC.XLOC_000478	LINC	1	524	39.5
lncRNA00484	TCONS_00000484	LINC.XLOC_000480	LINC	1	1915	40.37
lncRNA00488	TCONS_00000488	LINC.XLOC_000484	LINC	1	1310	39.77
lncRNA00492	TCONS_00000492	LINC.XLOC_000488	LINC	1	1404	36.47
lncRNA00495	TCONS_00000495	LINC.XLOC_000491	LINC	1	957	37.3
lncRNA00501	TCONS_00000501	LINC.XLOC_000497	LINC	1	1115	37.22
lncRNA00507	TCONS_00000507	LINC.XLOC_000503	LINC	1	850	30.94
lncRNA00510	TCONS_00000510	LINC.XLOC_000506	LINC	1	1948	33.57
lncRNA00511	TCONS_00000511	LINC.XLOC_000507	LINC	1	907	38.37
lncRNA00512	TCONS_00000512	LINC.XLOC_000508	LINC	1	797	43.16
lncRNA00516	TCONS_00000516	LINC.XLOC_000512	LINC	1	3446	41.85
lncRNA00517	TCONS_00000517	LINC.XLOC_000513	LINC	1	1465	35.09
lncRNA00523	TCONS_00000523	LINC.XLOC_000519	LINC	1	1058	37.43
lncRNA00524	TCONS_00000524	LINC.XLOC_000519	LINC	2	473	31.92
lncRNA00533	TCONS_00000533	LINC.XLOC_000528	LINC	1	3645	38.57
lncRNA00534	TCONS_00000534	LINC.XLOC_000529	LINC	1	1506	39.58
lncRNA00536	TCONS_00000536	LINC.XLOC_000531	LINC	1	1564	32.42
lncRNA00537	TCONS_00000537	LINC.XLOC_000532	LINC	1	538	38.1
lncRNA00551	TCONS_00000551	LINC.XLOC_000546	LINC	1	467	34.26
lncRNA00552	TCONS_00000552	LINC.XLOC_000547	LINC	1	1031	33.95
lncRNA00554	TCONS_00000554	LINC.XLOC_000549	LINC	1	1009	37.66
lncRNA00556	TCONS_00000556	LINC.XLOC_000551	LINC	1	1917	40.74
lncRNA00565	TCONS_00000565	LINC.XLOC_000560	LINC	1	1139	40.3
lncRNA00571	TCONS_00000571	LINC.XLOC_000566	LINC	1	1041	36.02
lncRNA00577	TCONS_00000577	LINC.XLOC_000571	LINC	2	3590	35.4
lncRNA00576	TCONS_00000576	LINC.XLOC_000571	LINC	1	4371	34.8
lncRNA00578	TCONS_00000578	LINC.XLOC_000572	LINC	1	2736	39.88
lncRNA00579	TCONS_00000579	LINC.XLOC_000573	LINC	1	439	41.69
lncRNA00593	TCONS_00000593	LINC.XLOC_000587	LINC	1	607	36.08
lncRNA00594	TCONS_00000594	LINC.XLOC_000588	LINC	1	1479	38.95
lncRNA00600	TCONS_00000600	LINC.XLOC_000594	LINC	1	1032	38.95
lncRNA00604	TCONS_00000604	LINC.XLOC_000598	LINC	1	4608	38.91
lncRNA00607	TCONS_00000607	LINC.XLOC_000601	LINC	1	2271	36.5
lncRNA00610	TCONS_00000610	LINC.XLOC_000604	LINC	1	867	37.37
lncRNA00611	TCONS_00000611	LINC.XLOC_000605	LINC	1	728	40.52
lncRNA00612	TCONS_00000612	LINC.XLOC_000606	LINC	1	619	38.93
lncRNA00613	TCONS_00000613	LINC.XLOC_000607	LINC	1	1960	38.37
lncRNA00614	TCONS_00000614	LINC.XLOC_000608	LINC	1	1489	39.76
lncRNA00615	TCONS_00000615	LINC.XLOC_000609	LINC	1	1432	37.22
lncRNA00617	TCONS_00000617	LINC.XLOC_000611	LINC	1	1424	35.53
lncRNA00618	TCONS_00000618	LINC.XLOC_000612	LINC	1	2113	35.49
lncRNA00621	TCONS_00000621	LINC.XLOC_000615	LINC	1	2493	38.99
lncRNA00622	TCONS_00000622	LINC.XLOC_000616	LINC	1	3056	35.93
lncRNA00630	TCONS_00000630	LINC.XLOC_000624	LINC	1	1981	39.07
lncRNA00633	TCONS_00000633	LINC.XLOC_000627	LINC	1	1897	39.38
lncRNA00640	TCONS_00000640	LINC.XLOC_000634	LINC	1	582	40.55
lncRNA00656	TCONS_00000656	LINC.XLOC_000650	LINC	1	1049	41.66
lncRNA00657	TCONS_00000657	LINC.XLOC_000651	LINC	1	1029	37.71
lncRNA00662	TCONS_00000662	LINC.XLOC_000656	LINC	1	1200	35.25
lncRNA00675	TCONS_00000675	LINC.XLOC_000669	LINC	1	740	42.3
lncRNA00678	TCONS_00000678	LINC.XLOC_000672	LINC	1	558	41.22
lncRNA00683	TCONS_00000683	LINC.XLOC_000677	LINC	1	1203	39.57
lncRNA00687	TCONS_00000687	LINC.XLOC_000681	LINC	1	1120	36.79
lncRNA00695	TCONS_00000695	LINC.XLOC_000689	LINC	1	905	33.7
lncRNA00698	TCONS_00000698	LINC.XLOC_000692	LINC	1	1084	30.35
lncRNA00708	TCONS_00000708	LINC.XLOC_000701	LINC	1	2271	35.71
lncRNA00717	TCONS_00000717	LINC.XLOC_000710	LINC	1	1052	35.17
lncRNA00718	TCONS_00000718	LINC.XLOC_000711	LINC	1	1515	39.87
lncRNA00719	TCONS_00000719	LINC.XLOC_000712	LINC	1	926	29.27
lncRNA00721	TCONS_00000721	LINC.XLOC_000714	LINC	1	2467	36
lncRNA00722	TCONS_00000722	LINC.XLOC_000715	LINC	1	1065	37.18
lncRNA00725	TCONS_00000725	LINC.XLOC_000718	LINC	1	1995	36.74
lncRNA00726	TCONS_00000726	LINC.XLOC_000719	LINC	1	1095	33.7
lncRNA00728	TCONS_00000728	LINC.XLOC_000721	LINC	1	1203	34.58
lncRNA00734	TCONS_00000734	LINC.XLOC_000727	LINC	1	1137	29.02
lncRNA00737	TCONS_00000737	LINC.XLOC_000730	LINC	1	4171	39.63
lncRNA00738	TCONS_00000738	LINC.XLOC_000731	LINC	1	5221	37
lncRNA00742	TCONS_00000742	LINC.XLOC_000735	LINC	2	2041	38.8
lncRNA00743	TCONS_00000743	LINC.XLOC_000736	LINC	1	2024	39.08
lncRNA00745	TCONS_00000745	LINC.XLOC_000738	LINC	1	1125	39.64
lncRNA00746	TCONS_00000746	LINC.XLOC_000739	LINC	1	1287	40.09
lncRNA00760	TCONS_00000760	LINC.XLOC_000752	LINC	1	734	34.2
lncRNA00765	TCONS_00000765	LINC.XLOC_000757	LINC	1	1849	39.64
lncRNA00767	TCONS_00000767	LINC.XLOC_000759	LINC	1	1266	33.89
lncRNA00768	TCONS_00000768	LINC.XLOC_000760	LINC	1	948	35.44
lncRNA00771	TCONS_00000771	LINC.XLOC_000763	LINC	1	1422	34.95
lncRNA00774	TCONS_00000774	LINC.XLOC_000766	LINC	1	1687	36.57
lncRNA00775	TCONS_00000775	LINC.XLOC_000767	LINC	1	1283	39.67
lncRNA00776	TCONS_00000776	LINC.XLOC_000768	LINC	1	897	43.48
lncRNA00779	TCONS_00000779	LINC.XLOC_000771	LINC	1	916	37.34
lncRNA00782	TCONS_00000782	LINC.XLOC_000774	LINC	1	594	37.88
lncRNA00788	TCONS_00000788	LINC.XLOC_000780	LINC	1	2065	37.38
lncRNA00789	TCONS_00000789	LINC.XLOC_000781	LINC	1	670	30.45
lncRNA00790	TCONS_00000790	LINC.XLOC_000782	LINC	1	3298	44.21
lncRNA00792	TCONS_00000792	LINC.XLOC_000784	LINC	2	675	31.56
lncRNA00795	TCONS_00000795	LINC.XLOC_000787	LINC	1	849	40.4
lncRNA00802	TCONS_00000802	LINC.XLOC_000794	LINC	1	1438	38.53
lncRNA00803	TCONS_00000803	LINC.XLOC_000795	LINC	1	609	40.39
lncRNA00804	TCONS_00000804	LINC.XLOC_000796	LINC	1	1517	37.05
lncRNA00809	TCONS_00000809	LINC.XLOC_000801	LINC	1	2745	35.88
lncRNA00814	TCONS_00000814	LINC.XLOC_000806	LINC	1	1308	40.29
lncRNA00815	TCONS_00000815	LINC.XLOC_000807	LINC	1	3124	35.18
lncRNA00816	TCONS_00000816	LINC.XLOC_000808	LINC	1	375	35.47
lncRNA00826	TCONS_00000826	LINC.XLOC_000818	LINC	1	1098	35.34
lncRNA00827	TCONS_00000827	LINC.XLOC_000819	LINC	1	665	31.13
lncRNA00829	TCONS_00000829	LINC.XLOC_000821	LINC	1	3219	35.32
lncRNA00831	TCONS_00000831	LINC.XLOC_000823	LINC	1	1381	36.93
lncRNA00832	TCONS_00000832	LINC.XLOC_000824	LINC	1	460	38.48
lncRNA00834	TCONS_00000834	LINC.XLOC_000826	LINC	1	1465	36.31
lncRNA00835	TCONS_00000835	LINC.XLOC_000827	LINC	1	1766	41.22
lncRNA00839	TCONS_00000839	LINC.XLOC_000831	LINC	1	4185	36.68
lncRNA00842	TCONS_00000842	LINC.XLOC_000834	LINC	1	1253	36.31
lncRNA00843	TCONS_00000843	LINC.XLOC_000835	LINC	1	552	36.05
lncRNA00844	TCONS_00000844	LINC.XLOC_000836	LINC	1	1636	35.09
lncRNA00845	TCONS_00000845	LINC.XLOC_000837	LINC	1	1247	36.41
lncRNA00847	TCONS_00000847	LINC.XLOC_000839	LINC	1	2937	40.42
lncRNA00848	TCONS_00000848	LINC.XLOC_000840	LINC	1	4268	38.05
lncRNA00849	TCONS_00000849	LINC.XLOC_000841	LINC	1	1663	34.4
lncRNA00850	TCONS_00000850	LINC.XLOC_000842	LINC	1	1549	38.35
lncRNA00852	TCONS_00000852	LINC.XLOC_000844	LINC	2	1038	34.97
lncRNA00853	TCONS_00000853	LINC.XLOC_000845	LINC	1	894	36.8
lncRNA00860	TCONS_00000860	LINC.XLOC_000852	LINC	1	2261	37.86
lncRNA00862	TCONS_00000862	LINC.XLOC_000854	LINC	1	1444	35.18
lncRNA00863	TCONS_00000863	LINC.XLOC_000855	LINC	1	3892	40.42
lncRNA00867	TCONS_00000867	LINC.XLOC_000859	LINC	1	1268	39.59
lncRNA00874	TCONS_00000874	LINC.XLOC_000866	LINC	1	1296	35.8
lncRNA00875	TCONS_00000875	LINC.XLOC_000867	LINC	1	756	35.19
lncRNA00876	TCONS_00000876	LINC.XLOC_000868	LINC	1	1176	36.73
lncRNA00880	TCONS_00000880	LINC.XLOC_000872	LINC	1	2120	33.07
lncRNA00881	TCONS_00000881	LINC.XLOC_000873	LINC	1	3671	37.07
lncRNA00884	TCONS_00000884	LINC.XLOC_000876	LINC	1	600	36
lncRNA00885	TCONS_00000885	LINC.XLOC_000877	LINC	1	1531	31.03
lncRNA00890	TCONS_00000890	LINC.XLOC_000882	LINC	1	3026	41.28
lncRNA00892	TCONS_00000892	LINC.XLOC_000884	LINC	1	2001	42.63
lncRNA00893	TCONS_00000893	LINC.XLOC_000885	LINC	1	1932	45.45
lncRNA00895	TCONS_00000895	LINC.XLOC_000887	LINC	1	941	42.61
lncRNA00898	TCONS_00000898	LINC.XLOC_000890	LINC	1	1461	38.19
lncRNA00902	TCONS_00000902	LINC.XLOC_000894	LINC	1	674	30.27
lncRNA00903	TCONS_00000903	LINC.XLOC_000895	LINC	1	1986	33.84
lncRNA00905	TCONS_00000905	LINC.XLOC_000897	LINC	1	3369	38.44
lncRNA00908	TCONS_00000908	LINC.XLOC_000900	LINC	1	2846	34.05
lncRNA00911	TCONS_00000911	LINC.XLOC_000903	LINC	2	2702	39.86
lncRNA00912	TCONS_00000912	LINC.XLOC_000903	LINC	2	1257	39.38
lncRNA00915	TCONS_00000915	LINC.XLOC_000906	LINC	1	1306	37.06
lncRNA00916	TCONS_00000916	LINC.XLOC_000907	LINC	1	480	31.25
lncRNA00920	TCONS_00000920	LINC.XLOC_000911	LINC	1	1581	39.41
lncRNA00921	TCONS_00000921	LINC.XLOC_000912	LINC	1	1628	37.04
lncRNA00922	TCONS_00000922	LINC.XLOC_000913	LINC	1	1340	35.3
lncRNA00923	TCONS_00000923	LINC.XLOC_000914	LINC	1	1067	38.52
lncRNA00925	TCONS_00000925	LINC.XLOC_000916	LINC	2	1815	40.33
lncRNA00926	TCONS_00000926	LINC.XLOC_000917	LINC	1	2274	38.65
lncRNA00927	TCONS_00000927	LINC.XLOC_000918	LINC	1	1361	36.96
lncRNA00928	TCONS_00000928	LINC.XLOC_000919	LINC	1	2989	37.07
lncRNA00932	TCONS_00000932	LINC.XLOC_000923	LINC	1	349	30.09
lncRNA00935	TCONS_00000935	LINC.XLOC_000926	LINC	1	386	29.27
lncRNA00937	TCONS_00000937	LINC.XLOC_000928	LINC	1	3216	36.04
lncRNA00938	TCONS_00000938	LINC.XLOC_000929	LINC	1	351	38.75
lncRNA00939	TCONS_00000939	LINC.XLOC_000930	LINC	1	1236	39.08
lncRNA00942	TCONS_00000942	LINC.XLOC_000933	LINC	1	4895	39.61
lncRNA00944	TCONS_00000944	LINC.XLOC_000935	LINC	1	3968	43.02
lncRNA00947	TCONS_00000947	LINC.XLOC_000938	LINC	1	3832	38.52
lncRNA00955	TCONS_00000955	LINC.XLOC_000946	LINC	1	829	33.17
lncRNA00959	TCONS_00000959	LINC.XLOC_000950	LINC	1	1659	39.96
lncRNA00960	TCONS_00000960	LINC.XLOC_000951	LINC	1	3499	37.35
lncRNA00967	TCONS_00000967	LINC.XLOC_000958	LINC	1	730	35.89
lncRNA00969	TCONS_00000969	LINC.XLOC_000960	LINC	1	929	35.52
lncRNA00970	TCONS_00000970	LINC.XLOC_000961	LINC	1	2541	35.06
lncRNA00971	TCONS_00000971	LINC.XLOC_000962	LINC	1	1644	39.48
lncRNA00972	TCONS_00000972	LINC.XLOC_000963	LINC	1	3682	39
lncRNA00978	TCONS_00000978	LINC.XLOC_000969	LINC	1	1157	37.77
lncRNA00979	TCONS_00000979	LINC.XLOC_000970	LINC	1	838	32.1
lncRNA00981	TCONS_00000981	LINC.XLOC_000972	LINC	1	897	40.13
lncRNA00982	TCONS_00000982	LINC.XLOC_000973	LINC	1	1761	40.09
lncRNA00988	TCONS_00000988	LINC.XLOC_000979	LINC	1	2886	32.29
lncRNA00989	TCONS_00000989	LINC.XLOC_000980	LINC	1	1678	38.08
lncRNA00991	TCONS_00000991	LINC.XLOC_000982	LINC	1	380	27.11
lncRNA00993	TCONS_00000993	LINC.XLOC_000984	LINC	1	3393	34.63
lncRNA00994	TCONS_00000994	LINC.XLOC_000985	LINC	1	992	35.18
lncRNA00999	TCONS_00000999	LINC.XLOC_000990	LINC	1	903	38.43
lncRNA01000	TCONS_00001000	LINC.XLOC_000991	LINC	1	1724	41.13
lncRNA01001	TCONS_00001001	LINC.XLOC_000992	LINC	1	1564	37.21
lncRNA01004	TCONS_00001004	LINC.XLOC_000995	LINC	1	5178	37.78
lncRNA01006	TCONS_00001006	LINC.XLOC_000997	LINC	1	6910	39.31
lncRNA01008	TCONS_00001008	LINC.XLOC_000999	LINC	1	1590	35.28
lncRNA01010	TCONS_00001010	LINC.XLOC_001001	LINC	1	4702	37.32
lncRNA01011	TCONS_00001011	LINC.XLOC_001002	LINC	1	1080	37.41
lncRNA01014	TCONS_00001014	LINC.XLOC_001005	LINC	1	1401	37.83
lncRNA01020	TCONS_00001020	LINC.XLOC_001011	LINC	1	268	39.93
lncRNA01021	TCONS_00001021	LINC.XLOC_001012	LINC	1	1537	35
lncRNA01023	TCONS_00001023	LINC.XLOC_001014	LINC	1	1304	38.19
lncRNA01030	TCONS_00001030	LINC.XLOC_001021	LINC	2	1416	37.08
lncRNA01031	TCONS_00001031	LINC.XLOC_001021	LINC	3	1505	37.14
lncRNA01032	TCONS_00001032	LINC.XLOC_001022	LINC	1	1091	34.1
lncRNA01033	TCONS_00001033	LINC.XLOC_001023	LINC	1	1053	36.85
lncRNA01034	TCONS_00001034	LINC.XLOC_001024	LINC	1	3155	45.48
lncRNA01035	TCONS_00001035	LINC.XLOC_001025	LINC	1	7465	39.69
lncRNA01037	TCONS_00001037	LINC.XLOC_001027	LINC	1	1411	36.92
lncRNA01038	TCONS_00001038	LINC.XLOC_001028	LINC	1	2239	42.92
lncRNA01039	TCONS_00001039	LINC.XLOC_001029	LINC	1	2188	38.16
lncRNA01040	TCONS_00001040	LINC.XLOC_001030	LINC	1	2435	36.47
lncRNA01043	TCONS_00001043	LINC.XLOC_001033	LINC	1	3428	36.67
lncRNA01044	TCONS_00001044	LINC.XLOC_001034	LINC	1	1960	38.47
lncRNA01046	TCONS_00001046	LINC.XLOC_001036	LINC	1	2110	38.67
lncRNA01047	TCONS_00001047	LINC.XLOC_001037	LINC	1	1253	36.55
lncRNA01050	TCONS_00001050	LINC.XLOC_001040	LINC	1	3229	40.6
lncRNA01051	TCONS_00001051	LINC.XLOC_001041	LINC	1	5475	38.56
lncRNA01059	TCONS_00001059	LINC.XLOC_001046	LINC	1	587	28.45
lncRNA01061	TCONS_00001061	LINC.XLOC_001048	LINC	1	1911	32.6
lncRNA01065	TCONS_00001065	LINC.XLOC_001052	LINC	1	688	31.69
lncRNA01070	TCONS_00001070	LINC.XLOC_001057	LINC	1	4262	36.37
lncRNA01071	TCONS_00001071	LINC.XLOC_001058	LINC	1	908	37.78
lncRNA01072	TCONS_00001072	LINC.XLOC_001059	LINC	1	1414	32.6
lncRNA01073	TCONS_00001073	LINC.XLOC_001060	LINC	1	1319	42.08
lncRNA01074	TCONS_00001074	LINC.XLOC_001061	LINC	1	1090	37.34
lncRNA01078	TCONS_00001078	LINC.XLOC_001065	LINC	1	431	31.79
lncRNA01080	TCONS_00001080	LINC.XLOC_001067	LINC	1	1114	41.2
lncRNA01087	TCONS_00001087	LINC.XLOC_001074	LINC	1	329	35.56
lncRNA01088	TCONS_00001088	LINC.XLOC_001075	LINC	1	793	37.07
lncRNA01090	TCONS_00001090	LINC.XLOC_001077	LINC	1	5867	39.97
lncRNA01091	TCONS_00001091	LINC.XLOC_001078	LINC	1	415	30.6
lncRNA01094	TCONS_00001094	LINC.XLOC_001081	LINC	1	4802	37.11
lncRNA01097	TCONS_00001097	LINC.XLOC_001084	LINC	1	1112	35.25
lncRNA01101	TCONS_00001101	LINC.XLOC_001088	LINC	1	2543	41.64
lncRNA01102	TCONS_00001102	LINC.XLOC_001089	LINC	1	1988	39.94
lncRNA01103	TCONS_00001103	LINC.XLOC_001090	LINC	1	1371	36.54
lncRNA01107	TCONS_00001107	LINC.XLOC_001094	LINC	1	1196	38.46
lncRNA01113	TCONS_00001113	LINC.XLOC_001099	LINC	1	1058	37.71
lncRNA01115	TCONS_00001115	LINC.XLOC_001101	LINC	1	1370	40.58
lncRNA01120	TCONS_00001120	LINC.XLOC_001106	LINC	1	1007	38.33
lncRNA01121	TCONS_00001121	LINC.XLOC_001107	LINC	1	428	32.24
lncRNA01126	TCONS_00001126	LINC.XLOC_001112	LINC	1	1263	33.41
lncRNA01128	TCONS_00001128	LINC.XLOC_001114	LINC	1	1876	37.37
lncRNA01130	TCONS_00001130	LINC.XLOC_001116	LINC	1	4703	38.08
lncRNA01132	TCONS_00001132	LINC.XLOC_001118	LINC	1	2232	34.86
lncRNA01133	TCONS_00001133	LINC.XLOC_001119	LINC	1	2192	42.7
lncRNA01134	TCONS_00001134	LINC.XLOC_001120	LINC	1	1122	35.47
lncRNA01136	TCONS_00001136	LINC.XLOC_001122	LINC	1	1408	36.43
lncRNA01137	TCONS_00001137	LINC.XLOC_001123	LINC	1	3064	40.83
lncRNA01143	TCONS_00001143	LINC.XLOC_001129	LINC	1	2586	34.49
lncRNA01148	TCONS_00001148	LINC.XLOC_001134	LINC	1	1597	37.57
lncRNA01155	TCONS_00001155	LINC.XLOC_001141	LINC	1	685	40.44
lncRNA01159	TCONS_00001159	LINC.XLOC_001145	LINC	1	1751	40.09
lncRNA01160	TCONS_00001160	LINC.XLOC_001146	LINC	1	2328	31.87
lncRNA01164	TCONS_00001164	LINC.XLOC_001150	LINC	1	1661	34.38
lncRNA01166	TCONS_00001166	LINC.XLOC_001152	LINC	1	674	37.83
lncRNA01167	TCONS_00001167	LINC.XLOC_001153	LINC	1	2625	39.09
lncRNA01169	TCONS_00001169	LINC.XLOC_001155	LINC	1	1794	39.69
lncRNA01170	TCONS_00001170	LINC.XLOC_001156	LINC	1	3806	36.42
lncRNA01171	TCONS_00001171	LINC.XLOC_001157	LINC	1	1123	37.76
lncRNA01177	TCONS_00001177	LINC.XLOC_001163	LINC	1	2387	39.88
lncRNA01181	TCONS_00001181	LINC.XLOC_001167	LINC	1	845	30.77
lncRNA01183	TCONS_00001183	LINC.XLOC_001169	LINC	1	1476	32.52
lncRNA01188	TCONS_00001188	LINC.XLOC_001174	LINC	1	839	36.83
lncRNA01189	TCONS_00001189	LINC.XLOC_001175	LINC	1	2426	41.92
lncRNA01190	TCONS_00001190	LINC.XLOC_001176	LINC	1	2061	41.63
lncRNA01191	TCONS_00001191	LINC.XLOC_001177	LINC	1	3358	38.24
lncRNA01192	TCONS_00001192	LINC.XLOC_001178	LINC	1	481	34.93
lncRNA01194	TCONS_00001194	LINC.XLOC_001180	LINC	1	3654	36.1
lncRNA01200	TCONS_00001200	LINC.XLOC_001186	LINC	1	790	29.37
lncRNA01203	TCONS_00001203	LINC.XLOC_001189	LINC	1	1346	40.27
lncRNA01211	TCONS_00001211	LINC.XLOC_001197	LINC	1	693	38.24
lncRNA01215	TCONS_00001215	LINC.XLOC_001201	LINC	1	579	36.27
lncRNA01216	TCONS_00001216	LINC.XLOC_001202	LINC	1	958	40.5
lncRNA01219	TCONS_00001219	LINC.XLOC_001205	LINC	1	1616	35.02
lncRNA01228	TCONS_00001228	LINC.XLOC_001214	LINC	1	1156	39.01
lncRNA01229	TCONS_00001229	LINC.XLOC_001215	LINC	1	3150	42.86
lncRNA01230	TCONS_00001230	LINC.XLOC_001216	LINC	1	2326	40.97
lncRNA01234	TCONS_00001234	LINC.XLOC_001220	LINC	1	365	42.19
lncRNA01235	TCONS_00001235	LINC.XLOC_001221	LINC	1	1915	34.99
lncRNA01236	TCONS_00001236	LINC.XLOC_001222	LINC	1	1874	41.94
lncRNA01242	TCONS_00001242	LINC.XLOC_001228	LINC	1	1702	40.89
lncRNA01248	TCONS_00001248	LINC.XLOC_001234	LINC	1	1293	32.17
lncRNA01252	TCONS_00001252	LINC.XLOC_001238	LINC	1	2459	36.27
lncRNA01254	TCONS_00001254	LINC.XLOC_001240	LINC	1	2687	36.77
lncRNA01265	TCONS_00001265	LINC.XLOC_001251	LINC	1	2071	40.85
lncRNA01266	TCONS_00001266	LINC.XLOC_001252	LINC	1	1134	34.74
lncRNA01269	TCONS_00001269	LINC.XLOC_001255	LINC	1	2657	38.5
lncRNA01272	TCONS_00001272	LINC.XLOC_001258	LINC	1	459	35.73
lncRNA01274	TCONS_00001274	LINC.XLOC_001260	LINC	1	1037	46.67
lncRNA01278	TCONS_00001278	LINC.XLOC_001264	LINC	1	3354	36.79
lncRNA01279	TCONS_00001279	LINC.XLOC_001265	LINC	1	1469	36.83
lncRNA01281	TCONS_00001281	LINC.XLOC_001267	LINC	1	827	33.49
lncRNA01283	TCONS_00001283	LINC.XLOC_001269	LINC	1	2014	35.55
lncRNA01285	TCONS_00001285	LINC.XLOC_001271	LINC	1	386	44.82
lncRNA01286	TCONS_00001286	LINC.XLOC_001272	LINC	1	985	40.1
lncRNA01287	TCONS_00001287	LINC.XLOC_001273	LINC	1	1880	36.65
lncRNA01288	TCONS_00001288	LINC.XLOC_001274	LINC	1	765	34.38
lncRNA01290	TCONS_00001290	LINC.XLOC_001276	LINC	1	1124	40.21
lncRNA01292	TCONS_00001292	LINC.XLOC_001278	LINC	1	2565	39.96
lncRNA01294	TCONS_00001294	LINC.XLOC_001280	LINC	1	786	38.17
lncRNA01295	TCONS_00001295	LINC.XLOC_001281	LINC	1	409	35.45
lncRNA01298	TCONS_00001298	LINC.XLOC_001284	LINC	1	1307	32.13
lncRNA01299	TCONS_00001299	LINC.XLOC_001285	LINC	2	1731	38.24
lncRNA01309	TCONS_00001309	LINC.XLOC_001295	LINC	1	2685	44.92
lncRNA01311	TCONS_00001311	LINC.XLOC_001296	LINC	3	670	44.33
lncRNA01310	TCONS_00001310	LINC.XLOC_001296	LINC	2	1175	41.53
lncRNA01314	TCONS_00001314	LINC.XLOC_001299	LINC	1	664	34.19
lncRNA01315	TCONS_00001315	LINC.XLOC_001300	LINC	1	1225	38.86
lncRNA01316	TCONS_00001316	LINC.XLOC_001301	LINC	1	1534	37.74
lncRNA01317	TCONS_00001317	LINC.XLOC_001302	LINC	1	4241	40.86
lncRNA01318	TCONS_00001318	LINC.XLOC_001303	LINC	1	1098	40.26
lncRNA01325	TCONS_00001325	LINC.XLOC_001310	LINC	1	915	39.67
lncRNA01326	TCONS_00001326	LINC.XLOC_001311	LINC	1	248	34.68
lncRNA01336	TCONS_00001336	LINC.XLOC_001321	LINC	1	2599	42.4
lncRNA01338	TCONS_00001338	LINC.XLOC_001323	LINC	1	1395	37.56
lncRNA01340	TCONS_00001340	LINC.XLOC_001325	LINC	1	6269	38.33
lncRNA01342	TCONS_00001342	LINC.XLOC_001327	LINC	2	3575	38.41
lncRNA01343	TCONS_00001343	LINC.XLOC_001328	LINC	1	2593	38.3
lncRNA01344	TCONS_00001344	LINC.XLOC_001329	LINC	1	1256	39.89
lncRNA01345	TCONS_00001345	LINC.XLOC_001330	LINC	1	1647	38.31
lncRNA01347	TCONS_00001347	LINC.XLOC_001332	LINC	1	1443	40.26
lncRNA01348	TCONS_00001348	LINC.XLOC_001333	LINC	1	1355	37.05
lncRNA01349	TCONS_00001349	LINC.XLOC_001334	LINC	1	3379	40.37
lncRNA01354	TCONS_00001354	LINC.XLOC_001339	LINC	1	1256	35.83
lncRNA01355	TCONS_00001355	LINC.XLOC_001340	LINC	1	1073	34.39
lncRNA01356	TCONS_00001356	LINC.XLOC_001341	LINC	1	870	35.86
lncRNA01357	TCONS_00001357	LINC.XLOC_001342	LINC	1	897	37.12
lncRNA01358	TCONS_00001358	LINC.XLOC_001343	LINC	1	2414	31.98
lncRNA01359	TCONS_00001359	LINC.XLOC_001344	LINC	1	2528	39.12
lncRNA01367	TCONS_00001367	LINC.XLOC_001352	LINC	1	1056	43.09
lncRNA01368	TCONS_00001368	LINC.XLOC_001353	LINC	1	2301	41.29
lncRNA01369	TCONS_00001369	LINC.XLOC_001354	LINC	1	3188	40.53
lncRNA01372	TCONS_00001372	LINC.XLOC_001357	LINC	1	1278	43.82
lncRNA01374	TCONS_00001374	LINC.XLOC_001359	LINC	1	677	35.89
lncRNA01375	TCONS_00001375	LINC.XLOC_001360	LINC	1	2291	37.01
lncRNA01376	TCONS_00001376	LINC.XLOC_001361	LINC	1	1347	36.82
lncRNA01379	TCONS_00001379	LINC.XLOC_001364	LINC	1	1188	37.96
lncRNA01381	TCONS_00001381	LINC.XLOC_001366	LINC	1	1603	37.12
lncRNA01389	TCONS_00001389	LINC.XLOC_001374	LINC	1	2687	34.24
lncRNA01394	TCONS_00001394	LINC.XLOC_001379	LINC	1	758	39.97
lncRNA01400	TCONS_00001400	LINC.XLOC_001385	LINC	1	1814	35.06
lncRNA01402	TCONS_00001402	LINC.XLOC_001387	LINC	1	2712	33.33
lncRNA01403	TCONS_00001403	LINC.XLOC_001388	LINC	1	1074	29.89
lncRNA01405	TCONS_00001405	LINC.XLOC_001390	LINC	1	2305	38.87
lncRNA01406	TCONS_00001406	LINC.XLOC_001391	LINC	1	1205	37.34
lncRNA01409	TCONS_00001409	LINC.XLOC_001394	LINC	1	1074	39.29
lncRNA01411	TCONS_00001411	LINC.XLOC_001396	LINC	1	1176	37.07
lncRNA01413	TCONS_00001413	LINC.XLOC_001398	LINC	1	1913	38.06
lncRNA01416	TCONS_00001416	LINC.XLOC_001401	LINC	1	2146	37.19
lncRNA01420	TCONS_00001420	LINC.XLOC_001405	LINC	1	1504	38.03
lncRNA01421	TCONS_00001421	LINC.XLOC_001406	LINC	1	6389	41.1
lncRNA01429	TCONS_00001429	LINC.XLOC_001414	LINC	1	975	28.1
lncRNA01432	TCONS_00001432	LINC.XLOC_001417	LINC	1	1173	34.1
lncRNA01436	TCONS_00001436	LINC.XLOC_001421	LINC	1	735	39.18
lncRNA01437	TCONS_00001437	LINC.XLOC_001422	LINC	1	1562	34.31
lncRNA01438	TCONS_00001438	LINC.XLOC_001423	LINC	1	2949	36.86
lncRNA01439	TCONS_00001439	LINC.XLOC_001424	LINC	1	465	36.56
lncRNA01440	TCONS_00001440	LINC.XLOC_001425	LINC	1	1485	36.97
lncRNA01443	TCONS_00001443	LINC.XLOC_001428	LINC	2	1157	36.04
lncRNA01450	TCONS_00001450	LINC.XLOC_001435	LINC	1	854	27.87
lncRNA01452	TCONS_00001452	LINC.XLOC_001437	LINC	1	2998	36.89
lncRNA01453	TCONS_00001453	LINC.XLOC_001438	LINC	1	2092	37.57
lncRNA01455	TCONS_00001455	LINC.XLOC_001440	LINC	1	766	43.21
lncRNA01456	TCONS_00001456	LINC.XLOC_001441	LINC	1	1060	43.96
lncRNA01457	TCONS_00001457	LINC.XLOC_001442	LINC	1	424	34.91
lncRNA01468	TCONS_00001468	LINC.XLOC_001453	LINC	1	1494	41.03
lncRNA01469	TCONS_00001469	LINC.XLOC_001454	LINC	1	821	31.3
lncRNA01471	TCONS_00001471	LINC.XLOC_001456	LINC	1	2144	34.65
lncRNA01472	TCONS_00001472	LINC.XLOC_001457	LINC	1	1205	34.44
lncRNA01475	TCONS_00001475	LINC.XLOC_001460	LINC	1	711	40.51
lncRNA01476	TCONS_00001476	LINC.XLOC_001461	LINC	1	4500	36.36
lncRNA01477	TCONS_00001477	LINC.XLOC_001462	LINC	1	2096	42.22
lncRNA01480	TCONS_00001480	LINC.XLOC_001465	LINC	1	1357	34.27
lncRNA01482	TCONS_00001482	LINC.XLOC_001467	LINC	1	1741	37.45
lncRNA01484	TCONS_00001484	LINC.XLOC_001469	LINC	1	1225	38.45
lncRNA01487	TCONS_00001487	LINC.XLOC_001470	LINC	5	11313	38.07
lncRNA01488	TCONS_00001488	LINC.XLOC_001470	LINC	5	10907	37.92
lncRNA01486	TCONS_00001486	LINC.XLOC_001470	LINC	4	11847	37.84
lncRNA01485	TCONS_00001485	LINC.XLOC_001470	LINC	4	11473	38.11
lncRNA01491	TCONS_00001491	LINC.XLOC_001470	LINC	3	9521	38.77
lncRNA01490	TCONS_00001490	LINC.XLOC_001470	LINC	4	8987	39.11
lncRNA01489	TCONS_00001489	LINC.XLOC_001470	LINC	2	4807	39.01
lncRNA01492	TCONS_00001492	LINC.XLOC_001471	LINC	1	1542	37.03
lncRNA01493	TCONS_00001493	LINC.XLOC_001472	LINC	1	1844	36.71
lncRNA01494	TCONS_00001494	LINC.XLOC_001473	LINC	1	762	26.9
lncRNA01500	TCONS_00001500	LINC.XLOC_001479	LINC	1	731	37.62
lncRNA01503	TCONS_00001503	LINC.XLOC_001482	LINC	1	2264	38.38
lncRNA01506	TCONS_00001506	LINC.XLOC_001485	LINC	1	1276	42.4
lncRNA01508	TCONS_00001508	LINC.XLOC_001487	LINC	1	218	39.91
lncRNA01509	TCONS_00001509	LINC.XLOC_001488	LINC	1	491	26.48
lncRNA01511	TCONS_00001511	LINC.XLOC_001490	LINC	1	1415	37.95
lncRNA01516	TCONS_00001516	LINC.XLOC_001495	LINC	1	1572	37.72
lncRNA01517	TCONS_00001517	LINC.XLOC_001496	LINC	1	772	39.9
lncRNA01518	TCONS_00001518	LINC.XLOC_001497	LINC	1	1754	40.02
lncRNA01519	TCONS_00001519	LINC.XLOC_001498	LINC	1	1810	34.86
lncRNA01520	TCONS_00001520	LINC.XLOC_001499	LINC	1	1761	30.83
lncRNA01521	TCONS_00001521	LINC.XLOC_001500	LINC	1	787	34.05
lncRNA01522	TCONS_00001522	LINC.XLOC_001501	LINC	1	2151	38.12
lncRNA01533	TCONS_00001533	LINC.XLOC_001512	LINC	1	2595	36.96
lncRNA01534	TCONS_00001534	LINC.XLOC_001513	LINC	1	5604	43.54
lncRNA01535	TCONS_00001535	LINC.XLOC_001514	LINC	1	1258	34.98
lncRNA01536	TCONS_00001536	LINC.XLOC_001515	LINC	1	860	35.58
lncRNA01539	TCONS_00001539	LINC.XLOC_001518	LINC	1	4233	37.11
lncRNA01540	TCONS_00001540	LINC.XLOC_001519	LINC	1	1365	33.92
lncRNA01543	TCONS_00001543	LINC.XLOC_001522	LINC	1	1467	38.85
lncRNA01544	TCONS_00001544	LINC.XLOC_001523	LINC	1	907	38.92
lncRNA01546	TCONS_00001546	LINC.XLOC_001525	LINC	1	2211	37.86
lncRNA01547	TCONS_00001547	LINC.XLOC_001526	LINC	1	996	40.96
lncRNA01549	TCONS_00001549	LINC.XLOC_001528	LINC	1	968	36.05
lncRNA01552	TCONS_00001552	LINC.XLOC_001531	LINC	1	1061	36.19
lncRNA01553	TCONS_00001553	LINC.XLOC_001532	LINC	1	809	36.34
lncRNA01554	TCONS_00001554	LINC.XLOC_001533	LINC	1	3481	43.84
lncRNA01555	TCONS_00001555	LINC.XLOC_001534	LINC	1	1452	39.12
lncRNA01556	TCONS_00001556	LINC.XLOC_001535	LINC	1	2222	40.68
lncRNA01558	TCONS_00001558	LINC.XLOC_001537	LINC	1	1494	35.34
lncRNA01559	TCONS_00001559	LINC.XLOC_001538	LINC	1	427	43.79
lncRNA01565	TCONS_00001565	LINC.XLOC_001544	LINC	1	3293	38.29
lncRNA01566	TCONS_00001566	LINC.XLOC_001545	LINC	1	1998	39.79
lncRNA01567	TCONS_00001567	LINC.XLOC_001546	LINC	1	1017	36.58
lncRNA01568	TCONS_00001568	LINC.XLOC_001547	LINC	1	759	38.47
lncRNA01569	TCONS_00001569	LINC.XLOC_001548	LINC	1	1079	36.52
lncRNA01571	TCONS_00001571	LINC.XLOC_001550	LINC	1	1377	41.39
lncRNA01573	TCONS_00001573	LINC.XLOC_001552	LINC	1	1937	36.5
lncRNA01574	TCONS_00001574	LINC.XLOC_001553	LINC	1	8564	39.72
lncRNA01575	TCONS_00001575	LINC.XLOC_001553	LINC	2	6874	39.99
lncRNA01576	TCONS_00001576	LINC.XLOC_001554	LINC	1	792	34.09
lncRNA01577	TCONS_00001577	LINC.XLOC_001555	LINC	1	3813	35.77
lncRNA01579	TCONS_00001579	LINC.XLOC_001557	LINC	1	1805	39.22
lncRNA01582	TCONS_00001582	LINC.XLOC_001560	LINC	1	2379	41.57
lncRNA01584	TCONS_00001584	LINC.XLOC_001562	LINC	1	2289	40.1
lncRNA01585	TCONS_00001585	LINC.XLOC_001563	LINC	1	3247	35.42
lncRNA01586	TCONS_00001586	LINC.XLOC_001564	LINC	1	2125	40.71
lncRNA01587	TCONS_00001587	LINC.XLOC_001565	LINC	1	2705	35.56
lncRNA01589	TCONS_00001589	LINC.XLOC_001567	LINC	1	945	40
lncRNA01590	TCONS_00001590	LINC.XLOC_001568	LINC	1	917	36.31
lncRNA01591	TCONS_00001591	LINC.XLOC_001569	LINC	1	1011	39.07
lncRNA01592	TCONS_00001592	LINC.XLOC_001570	LINC	1	942	31
lncRNA01593	TCONS_00001593	LINC.XLOC_001571	LINC	1	2207	37.79
lncRNA01594	TCONS_00001594	LINC.XLOC_001572	LINC	1	1069	37.04
lncRNA01596	TCONS_00001596	LINC.XLOC_001574	LINC	1	1657	37.42
lncRNA01597	TCONS_00001597	LINC.XLOC_001575	LINC	1	2211	45.32
lncRNA01599	TCONS_00001599	LINC.XLOC_001577	LINC	1	1751	34.67
lncRNA01600	TCONS_00001600	LINC.XLOC_001578	LINC	1	962	37.42
lncRNA01601	TCONS_00001601	LINC.XLOC_001579	LINC	1	2596	39.83
lncRNA01605	TCONS_00001605	LINC.XLOC_001583	LINC	1	1550	37.81
lncRNA01610	TCONS_00001610	LINC.XLOC_001588	LINC	1	4715	43.82
lncRNA01613	TCONS_00001613	LINC.XLOC_001591	LINC	2	1680	39.05
lncRNA01616	TCONS_00001616	LINC.XLOC_001594	LINC	1	2792	39.26
lncRNA01618	TCONS_00001618	LINC.XLOC_001596	LINC	1	2325	40.77
lncRNA01619	TCONS_00001619	LINC.XLOC_001597	LINC	1	2745	37.38
lncRNA01620	TCONS_00001620	LINC.XLOC_001598	LINC	1	2736	37.61
lncRNA01621	TCONS_00001621	LINC.XLOC_001599	LINC	1	5331	38
lncRNA01622	TCONS_00001622	LINC.XLOC_001600	LINC	1	1056	37.88
lncRNA01624	TCONS_00001624	LINC.XLOC_001601	LINC	2	5260	34.68
lncRNA01623	TCONS_00001623	LINC.XLOC_001601	LINC	3	2919	35.53
lncRNA01626	TCONS_00001626	LINC.XLOC_001603	LINC	1	6283	39.44
lncRNA01627	TCONS_00001627	LINC.XLOC_001604	LINC	1	1486	41.59
lncRNA01629	TCONS_00001629	LINC.XLOC_001606	LINC	1	3777	40.69
lncRNA01640	TCONS_00001640	LINC.XLOC_001617	LINC	1	927	37.54
lncRNA01641	TCONS_00001641	LINC.XLOC_001618	LINC	1	3646	39.66
lncRNA01643	TCONS_00001643	LINC.XLOC_001620	LINC	1	2871	44.17
lncRNA01644	TCONS_00001644	LINC.XLOC_001621	LINC	1	4086	37.37
lncRNA01645	TCONS_00001645	LINC.XLOC_001621	LINC	2	4266	38.35
lncRNA01654	TCONS_00001654	LINC.XLOC_001621	LINC	1	4202	38.72
lncRNA01647	TCONS_00001647	LINC.XLOC_001623	LINC	1	838	40.93
lncRNA01650	TCONS_00001650	LINC.XLOC_001626	LINC	1	6153	38.11
lncRNA01651	TCONS_00001651	LINC.XLOC_001627	LINC	1	1181	36.92
lncRNA01653	TCONS_00001653	LINC.XLOC_001629	LINC	1	1973	34.62
lncRNA01655	TCONS_00001655	LINC.XLOC_001630	LINC	1	3919	38.61
lncRNA01656	TCONS_00001656	LINC.XLOC_001631	LINC	1	797	38.14
lncRNA01660	TCONS_00001660	LINC.XLOC_001635	LINC	1	612	39.71
lncRNA01661	TCONS_00001661	LINC.XLOC_001636	LINC	1	3175	43.02
lncRNA01663	TCONS_00001663	LINC.XLOC_001638	LINC	1	3626	36.93
lncRNA01664	TCONS_00001664	LINC.XLOC_001639	LINC	1	383	26.63
lncRNA01665	TCONS_00001665	LINC.XLOC_001640	LINC	1	1247	35.45
lncRNA01666	TCONS_00001666	LINC.XLOC_001641	LINC	1	3005	38.2
lncRNA01667	TCONS_00001667	LINC.XLOC_001642	LINC	1	6345	41.56
lncRNA01668	TCONS_00001668	LINC.XLOC_001643	LINC	1	943	34.99
lncRNA01671	TCONS_00001671	LINC.XLOC_001646	LINC	1	2885	41.35
lncRNA01675	TCONS_00001675	LINC.XLOC_001650	LINC	1	937	37.78
lncRNA01676	TCONS_00001676	LINC.XLOC_001651	LINC	1	745	37.32
lncRNA01677	TCONS_00001677	LINC.XLOC_001652	LINC	1	4758	41.24
lncRNA01678	TCONS_00001678	LINC.XLOC_001653	LINC	2	799	35.79
lncRNA01679	TCONS_00001679	LINC.XLOC_001654	LINC	1	1854	38.62
lncRNA01681	TCONS_00001681	LINC.XLOC_001656	LINC	1	1333	37.73
lncRNA01692	TCONS_00001692	LINC.XLOC_001667	LINC	1	3930	42.65
lncRNA01698	TCONS_00001698	LINC.XLOC_001672	LINC	1	2618	38.5
lncRNA01699	TCONS_00001699	LINC.XLOC_001673	LINC	1	1008	36.21
lncRNA01702	TCONS_00001702	LINC.XLOC_001676	LINC	1	1974	32.93
lncRNA01703	TCONS_00001703	LINC.XLOC_001677	LINC	1	733	37.11
lncRNA01708	TCONS_00001708	LINC.XLOC_001682	LINC	1	1152	34.55
lncRNA01711	TCONS_00001711	LINC.XLOC_001685	LINC	1	1287	38.31
lncRNA01713	TCONS_00001713	LINC.XLOC_001687	LINC	1	5279	34.61
lncRNA01717	TCONS_00001717	LINC.XLOC_001691	LINC	1	736	40.9
lncRNA01718	TCONS_00001718	LINC.XLOC_001692	LINC	1	5787	35.58
lncRNA01719	TCONS_00001719	LINC.XLOC_001693	LINC	1	3332	40.7
lncRNA01721	TCONS_00001721	LINC.XLOC_001695	LINC	1	1027	34.57
lncRNA01725	TCONS_00001725	LINC.XLOC_001699	LINC	1	2247	38.85
lncRNA01726	TCONS_00001726	LINC.XLOC_001700	LINC	1	2397	37.51
lncRNA01728	TCONS_00001728	LINC.XLOC_001702	LINC	1	1264	44.78
lncRNA01731	TCONS_00001731	LINC.XLOC_001705	LINC	1	4393	40.22
lncRNA01732	TCONS_00001732	LINC.XLOC_001706	LINC	1	745	38.26
lncRNA01733	TCONS_00001733	LINC.XLOC_001707	LINC	2	1849	36.4
lncRNA01734	TCONS_00001734	LINC.XLOC_001708	LINC	1	6192	39.37
lncRNA01735	TCONS_00001735	LINC.XLOC_001709	LINC	1	4311	38.55
lncRNA01736	TCONS_00001736	LINC.XLOC_001710	LINC	1	4873	38.03
lncRNA01737	TCONS_00001737	LINC.XLOC_001710	LINC	2	2447	43.93
lncRNA01739	TCONS_00001739	LINC.XLOC_001710	LINC	2	2350	46.77
lncRNA01738	TCONS_00001738	LINC.XLOC_001711	LINC	1	2483	42.25
lncRNA01740	TCONS_00001740	LINC.XLOC_001712	LINC	1	510	29.22
lncRNA01741	TCONS_00001741	LINC.XLOC_001713	LINC	1	2732	38.8
lncRNA01744	TCONS_00001744	LINC.XLOC_001716	LINC	1	4490	41.69
lncRNA01747	TCONS_00001747	LINC.XLOC_001719	LINC	1	4258	42.63
lncRNA01748	TCONS_00001748	LINC.XLOC_001720	LINC	2	1228	36.89
lncRNA01749	TCONS_00001749	LINC.XLOC_001721	LINC	1	1189	32.38
lncRNA01750	TCONS_00001750	LINC.XLOC_001722	LINC	1	1816	36.18
lncRNA01751	TCONS_00001751	LINC.XLOC_001723	LINC	1	981	40.27
lncRNA01752	TCONS_00001752	LINC.XLOC_001724	LINC	1	3832	40.89
lncRNA01753	TCONS_00001753	LINC.XLOC_001725	LINC	1	771	38.26
lncRNA01756	TCONS_00001756	LINC.XLOC_001728	LINC	1	1416	41.6
lncRNA01758	TCONS_00001758	LINC.XLOC_001730	LINC	1	4061	40.88
lncRNA01759	TCONS_00001759	LINC.XLOC_001731	LINC	1	2585	41.51
lncRNA01760	TCONS_00001760	LINC.XLOC_001732	LINC	1	1284	38.08
lncRNA01762	TCONS_00001762	LINC.XLOC_001734	LINC	1	3215	36.17
lncRNA01763	TCONS_00001763	LINC.XLOC_001735	LINC	1	876	37.9
lncRNA01765	TCONS_00001765	LINC.XLOC_001737	LINC	1	1001	31.97
lncRNA01766	TCONS_00001766	LINC.XLOC_001738	LINC	1	3206	38.86
lncRNA01773	TCONS_00001773	LINC.XLOC_001745	LINC	1	5476	41.67
lncRNA01774	TCONS_00001774	LINC.XLOC_001746	LINC	1	1248	38.38
lncRNA01780	TCONS_00001780	LINC.XLOC_001752	LINC	1	961	36.94
lncRNA01782	TCONS_00001782	LINC.XLOC_001754	LINC	1	814	38.21
lncRNA01787	TCONS_00001787	LINC.XLOC_001759	LINC	1	1300	39
lncRNA01789	TCONS_00001789	LINC.XLOC_001761	LINC	1	968	34.61
lncRNA01792	TCONS_00001792	LINC.XLOC_001764	LINC	1	803	34.87
lncRNA01794	TCONS_00001794	LINC.XLOC_001766	LINC	1	808	38
lncRNA01795	TCONS_00001795	LINC.XLOC_001767	LINC	1	2222	35.82
lncRNA01798	TCONS_00001798	LINC.XLOC_001770	LINC	2	2043	37.35
lncRNA01801	TCONS_00001801	LINC.XLOC_001773	LINC	1	2223	38.73
lncRNA01806	TCONS_00001806	LINC.XLOC_001778	LINC	1	1165	38.88
lncRNA01809	TCONS_00001809	LINC.XLOC_001781	LINC	1	1056	36.84
lncRNA01812	TCONS_00001812	LINC.XLOC_001784	LINC	1	705	36.45
lncRNA01819	TCONS_00001819	LINC.XLOC_001791	LINC	1	1618	36.77
lncRNA01844	TCONS_00001844	LINC.XLOC_001815	LINC	1	858	39.51
lncRNA01849	TCONS_00001849	LINC.XLOC_001820	LINC	1	1142	39.4
lncRNA01850	TCONS_00001850	LINC.XLOC_001821	LINC	1	1199	38.03
lncRNA01851	TCONS_00001851	LINC.XLOC_001822	LINC	1	1039	38.5
lncRNA01853	TCONS_00001853	LINC.XLOC_001824	LINC	1	2176	38.65
lncRNA01861	TCONS_00001861	LINC.XLOC_001832	LINC	1	4737	39.16
lncRNA01862	TCONS_00001862	LINC.XLOC_001833	LINC	1	1078	40.17
lncRNA01864	TCONS_00001864	LINC.XLOC_001835	LINC	1	712	39.75
lncRNA01865	TCONS_00001865	LINC.XLOC_001836	LINC	1	730	34.66
lncRNA01870	TCONS_00001870	LINC.XLOC_001841	LINC	1	1318	41.35
lncRNA01872	TCONS_00001872	LINC.XLOC_001843	LINC	1	2155	38.65
lncRNA01877	TCONS_00001877	LINC.XLOC_001848	LINC	1	2092	37.43
lncRNA01878	TCONS_00001878	LINC.XLOC_001849	LINC	1	1407	39.3
lncRNA01879	TCONS_00001879	LINC.XLOC_001850	LINC	1	2801	37.52
lncRNA01880	TCONS_00001880	LINC.XLOC_001851	LINC	1	3387	38.38
lncRNA01886	TCONS_00001886	LINC.XLOC_001857	LINC	1	772	38.21
lncRNA01895	TCONS_00001895	LINC.XLOC_001865	LINC	1	1790	35.92
lncRNA01900	TCONS_00001900	LINC.XLOC_001870	LINC	1	1927	39.54
lncRNA01901	TCONS_00001901	LINC.XLOC_001871	LINC	1	486	36.83
lncRNA01913	TCONS_00001913	LINC.XLOC_001883	LINC	1	3938	39
lncRNA01914	TCONS_00001914	LINC.XLOC_001884	LINC	1	1438	43.46
lncRNA01921	TCONS_00001921	LINC.XLOC_001891	LINC	1	1235	35.79
lncRNA01924	TCONS_00001924	LINC.XLOC_001894	LINC	1	1499	39.29
lncRNA01927	TCONS_00001927	LINC.XLOC_001897	LINC	1	1266	38.47
lncRNA01932	TCONS_00001932	LINC.XLOC_001902	LINC	1	647	36.32
lncRNA01934	TCONS_00001934	LINC.XLOC_001904	LINC	1	1337	36.72
lncRNA01935	TCONS_00001935	LINC.XLOC_001905	LINC	1	2585	36.67
lncRNA01936	TCONS_00001936	LINC.XLOC_001906	LINC	1	1181	31.92
lncRNA01938	TCONS_00001938	LINC.XLOC_001908	LINC	1	2789	39.26
lncRNA01939	TCONS_00001939	LINC.XLOC_001909	LINC	1	1668	39.33
lncRNA01943	TCONS_00001943	LINC.XLOC_001913	LINC	1	895	41.12
lncRNA01944	TCONS_00001944	LINC.XLOC_001914	LINC	1	5506	41.68
lncRNA01946	TCONS_00001946	LINC.XLOC_001916	LINC	1	2703	37.29
lncRNA01947	TCONS_00001947	LINC.XLOC_001917	LINC	1	455	35.16
lncRNA01951	TCONS_00001951	LINC.XLOC_001921	LINC	1	357	35.01
lncRNA01952	TCONS_00001952	LINC.XLOC_001922	LINC	1	480	32.92
lncRNA01953	TCONS_00001953	LINC.XLOC_001923	LINC	1	1006	39.26
lncRNA01961	TCONS_00001961	LINC.XLOC_001931	LINC	1	2480	37.18
lncRNA01966	TCONS_00001966	LINC.XLOC_001936	LINC	1	1281	35.6
lncRNA01973	TCONS_00001973	LINC.XLOC_001943	LINC	1	1196	41.89
lncRNA01976	TCONS_00001976	LINC.XLOC_001946	LINC	1	1582	40.14
lncRNA01981	TCONS_00001981	LINC.XLOC_001951	LINC	1	901	37.51
lncRNA01986	TCONS_00001986	LINC.XLOC_001956	LINC	1	1231	42.97
lncRNA01991	TCONS_00001991	LINC.XLOC_001961	LINC	1	678	28.32
lncRNA01995	TCONS_00001995	LINC.XLOC_001965	LINC	1	1286	38.8
lncRNA01996	TCONS_00001996	LINC.XLOC_001966	LINC	1	1931	36.04
lncRNA02003	TCONS_00002003	LINC.XLOC_001973	LINC	1	957	35.32
lncRNA02005	TCONS_00002005	LINC.XLOC_001975	LINC	1	1781	38.63
lncRNA02006	TCONS_00002006	LINC.XLOC_001976	LINC	1	1611	36.44
lncRNA02007	TCONS_00002007	LINC.XLOC_001977	LINC	1	1250	34.32
lncRNA02010	TCONS_00002010	LINC.XLOC_001980	LINC	1	640	41.41
lncRNA02024	TCONS_00002024	LINC.XLOC_001994	LINC	1	1646	38.82
lncRNA02025	TCONS_00002025	LINC.XLOC_001995	LINC	1	1742	33.93
lncRNA02027	TCONS_00002027	LINC.XLOC_001997	LINC	1	603	30.51
lncRNA02029	TCONS_00002029	LINC.XLOC_001999	LINC	1	588	37.07
lncRNA02034	TCONS_00002034	LINC.XLOC_002004	LINC	1	2296	38.33
lncRNA02035	TCONS_00002035	LINC.XLOC_002005	LINC	1	1167	38.56
lncRNA02037	TCONS_00002037	LINC.XLOC_002007	LINC	1	1065	36.06
lncRNA02039	TCONS_00002039	LINC.XLOC_002009	LINC	1	913	38.34
lncRNA02043	TCONS_00002043	LINC.XLOC_002013	LINC	1	885	38.53
lncRNA02052	TCONS_00002052	LINC.XLOC_002022	LINC	1	2887	41.84
lncRNA02059	TCONS_00002059	LINC.XLOC_002029	LINC	1	500	31.4
lncRNA02060	TCONS_00002060	LINC.XLOC_002030	LINC	1	1359	38.48
lncRNA02061	TCONS_00002061	LINC.XLOC_002031	LINC	1	1821	39.59
lncRNA02081	TCONS_00002081	LINC.XLOC_002051	LINC	1	1295	39.54
lncRNA02083	TCONS_00002083	LINC.XLOC_002053	LINC	1	3318	36.83
lncRNA02084	TCONS_00002084	LINC.XLOC_002054	LINC	1	702	35.33
lncRNA02087	TCONS_00002087	LINC.XLOC_002057	LINC	1	1797	38.01
lncRNA02088	TCONS_00002088	LINC.XLOC_002058	LINC	1	850	35.18
lncRNA02092	TCONS_00002092	LINC.XLOC_002062	LINC	1	725	37.79
lncRNA02097	TCONS_00002097	LINC.XLOC_002067	LINC	1	3069	41.81
lncRNA02101	TCONS_00002101	LINC.XLOC_002071	LINC	1	1575	39.24
lncRNA02104	TCONS_00002104	LINC.XLOC_002074	LINC	1	422	32.94
lncRNA02105	TCONS_00002105	LINC.XLOC_002075	LINC	1	1029	34.21
lncRNA02111	TCONS_00002111	LINC.XLOC_002081	LINC	1	567	35.1
lncRNA02112	TCONS_00002112	LINC.XLOC_002082	LINC	1	1265	35.49
lncRNA02113	TCONS_00002113	LINC.XLOC_002083	LINC	1	607	33.61
lncRNA02114	TCONS_00002114	LINC.XLOC_002084	LINC	1	1352	37.8
lncRNA02116	TCONS_00002116	LINC.XLOC_002086	LINC	1	1160	35.34
lncRNA02127	TCONS_00002127	LINC.XLOC_002097	LINC	1	1294	39.03
lncRNA02131	TCONS_00002131	LINC.XLOC_002101	LINC	1	2084	36.42
lncRNA02136	TCONS_00002136	LINC.XLOC_002106	LINC	1	617	35.01
lncRNA02137	TCONS_00002137	LINC.XLOC_002107	LINC	1	1811	35.67
lncRNA02138	TCONS_00002138	LINC.XLOC_002108	LINC	1	989	36.7
lncRNA02141	TCONS_00002141	LINC.XLOC_002111	LINC	2	1945	35.99
lncRNA02142	TCONS_00002142	LINC.XLOC_002111	LINC	1	3158	35.53
lncRNA02153	TCONS_00002153	LINC.XLOC_002122	LINC	1	1525	36.85
lncRNA02154	TCONS_00002154	LINC.XLOC_002123	LINC	1	1760	36.02
lncRNA02156	TCONS_00002156	LINC.XLOC_002125	LINC	1	1013	33.96
lncRNA02157	TCONS_00002157	LINC.XLOC_002126	LINC	1	438	36.99
lncRNA02158	TCONS_00002158	LINC.XLOC_002127	LINC	1	2850	40.81
lncRNA02162	TCONS_00002162	LINC.XLOC_002131	LINC	1	1828	39.28
lncRNA02164	TCONS_00002164	LINC.XLOC_002131	LINC	2	2712	39.31
lncRNA02163	TCONS_00002163	LINC.XLOC_002131	LINC	2	1757	38.3
lncRNA02166	TCONS_00002166	LINC.XLOC_002133	LINC	1	966	36.85
lncRNA02171	TCONS_00002171	LINC.XLOC_002138	LINC	1	1117	39.93
lncRNA02173	TCONS_00002173	LINC.XLOC_002140	LINC	1	679	33.87
lncRNA02178	TCONS_00002178	LINC.XLOC_002145	LINC	1	2406	36.82
lncRNA02180	TCONS_00002180	LINC.XLOC_002147	LINC	1	739	36.67
lncRNA02181	TCONS_00002181	LINC.XLOC_002148	LINC	1	1306	35.15
lncRNA02193	TCONS_00002193	LINC.XLOC_002160	LINC	1	1743	34.83
lncRNA02203	TCONS_00002203	LINC.XLOC_002170	LINC	1	2398	32.36
lncRNA02205	TCONS_00002205	LINC.XLOC_002172	LINC	1	435	30.57
lncRNA02206	TCONS_00002206	LINC.XLOC_002173	LINC	1	1231	38.26
lncRNA02210	TCONS_00002210	LINC.XLOC_002177	LINC	1	3377	39.38
lncRNA02213	TCONS_00002213	LINC.XLOC_002180	LINC	1	942	40.87
lncRNA02220	TCONS_00002220	LINC.XLOC_002187	LINC	1	2351	39.9
lncRNA02224	TCONS_00002224	LINC.XLOC_002191	LINC	1	994	38.83
lncRNA02235	TCONS_00002235	LINC.XLOC_002202	LINC	1	1474	39.82
lncRNA02238	TCONS_00002238	LINC.XLOC_002205	LINC	1	2189	31.8
lncRNA02244	TCONS_00002244	LINC.XLOC_002210	LINC	2	546	36.63
lncRNA02243	TCONS_00002243	LINC.XLOC_002210	LINC	1	1052	37.07
lncRNA02246	TCONS_00002246	LINC.XLOC_002212	LINC	1	1135	38.15
lncRNA02249	TCONS_00002249	LINC.XLOC_002215	LINC	1	5049	37.39
lncRNA02250	TCONS_00002250	LINC.XLOC_002216	LINC	1	502	32.07
lncRNA02251	TCONS_00002251	LINC.XLOC_002217	LINC	1	2689	41.61
lncRNA02254	TCONS_00002254	LINC.XLOC_002220	LINC	1	746	38.47
lncRNA02258	TCONS_00002258	LINC.XLOC_002224	LINC	1	723	39.7
lncRNA02265	TCONS_00002265	LINC.XLOC_002230	LINC	1	1435	31.99
lncRNA02267	TCONS_00002267	LINC.XLOC_002232	LINC	1	1389	37.08
lncRNA02269	TCONS_00002269	LINC.XLOC_002234	LINC	1	2035	43.05
lncRNA02271	TCONS_00002271	LINC.XLOC_002236	LINC	1	485	32.58
lncRNA02273	TCONS_00002273	LINC.XLOC_002238	LINC	1	2198	36.99
lncRNA02275	TCONS_00002275	LINC.XLOC_002240	LINC	1	1054	33.59
lncRNA02298	TCONS_00002298	LINC.XLOC_002259	LINC	1	945	37.78
lncRNA02302	TCONS_00002302	LINC.XLOC_002263	LINC	1	1446	38.8
lncRNA02304	TCONS_00002304	LINC.XLOC_002265	LINC	1	2287	38
lncRNA02306	TCONS_00002306	LINC.XLOC_002267	LINC	1	915	35.63
lncRNA02308	TCONS_00002308	LINC.XLOC_002269	LINC	1	1345	39.41
lncRNA02309	TCONS_00002309	LINC.XLOC_002270	LINC	1	581	39.59
lncRNA02310	TCONS_00002310	LINC.XLOC_002271	LINC	1	862	38.52
lncRNA02311	TCONS_00002311	LINC.XLOC_002272	LINC	1	662	26.44
lncRNA02313	TCONS_00002313	LINC.XLOC_002274	LINC	1	3567	34.12
lncRNA02314	TCONS_00002314	LINC.XLOC_002275	LINC	1	3318	37.88
lncRNA02315	TCONS_00002315	LINC.XLOC_002276	LINC	1	529	34.59
lncRNA02317	TCONS_00002317	LINC.XLOC_002278	LINC	1	755	36.16
lncRNA02319	TCONS_00002319	LINC.XLOC_002280	LINC	1	3548	37.82
lncRNA02320	TCONS_00002320	LINC.XLOC_002281	LINC	1	817	40.76
lncRNA02324	TCONS_00002324	LINC.XLOC_002285	LINC	1	1533	42.14
lncRNA02330	TCONS_00002330	LINC.XLOC_002291	LINC	1	391	39.13
lncRNA02332	TCONS_00002332	LINC.XLOC_002293	LINC	1	3974	36.81
lncRNA02333	TCONS_00002333	LINC.XLOC_002294	LINC	1	1192	38.42
lncRNA02334	TCONS_00002334	LINC.XLOC_002295	LINC	1	1360	36.62
lncRNA02335	TCONS_00002335	LINC.XLOC_002296	LINC	1	1007	37.54
lncRNA02339	TCONS_00002339	LINC.XLOC_002300	LINC	1	649	33.44
lncRNA02346	TCONS_00002346	LINC.XLOC_002307	LINC	1	1135	30.31
lncRNA02347	TCONS_00002347	LINC.XLOC_002308	LINC	1	1945	41.95
lncRNA02350	TCONS_00002350	LINC.XLOC_002311	LINC	1	1016	35.93
lncRNA02351	TCONS_00002351	LINC.XLOC_002312	LINC	1	1729	36.44
lncRNA02352	TCONS_00002352	LINC.XLOC_002313	LINC	1	1866	36.44
lncRNA02356	TCONS_00002356	LINC.XLOC_002317	LINC	1	384	30.73
lncRNA02361	TCONS_00002361	LINC.XLOC_002322	LINC	1	2220	35.68
lncRNA02362	TCONS_00002362	LINC.XLOC_002323	LINC	1	759	38.21
lncRNA02365	TCONS_00002365	LINC.XLOC_002326	LINC	1	1543	32.4
lncRNA02366	TCONS_00002366	LINC.XLOC_002327	LINC	1	644	30.9
lncRNA02368	TCONS_00002368	LINC.XLOC_002329	LINC	1	4383	41.32
lncRNA02372	TCONS_00002372	LINC.XLOC_002333	LINC	1	3649	42.26
lncRNA02377	TCONS_00002377	LINC.XLOC_002338	LINC	1	3728	38.52
lncRNA02383	TCONS_00002383	LINC.XLOC_002344	LINC	1	2866	40.82
lncRNA02384	TCONS_00002384	LINC.XLOC_002345	LINC	1	627	34.77
lncRNA02385	TCONS_00002385	LINC.XLOC_002346	LINC	1	1406	39.76
lncRNA02389	TCONS_00002389	LINC.XLOC_002350	LINC	1	2572	32.93
lncRNA02391	TCONS_00002391	LINC.XLOC_002352	LINC	1	2804	39.02
lncRNA02395	TCONS_00002395	LINC.XLOC_002356	LINC	1	3280	41.89
lncRNA02396	TCONS_00002396	LINC.XLOC_002357	LINC	1	1220	44.67
lncRNA02414	TCONS_00002414	LINC.XLOC_002375	LINC	1	3136	39.7
lncRNA02415	TCONS_00002415	LINC.XLOC_002376	LINC	1	4875	36.51
lncRNA02418	TCONS_00002418	LINC.XLOC_002379	LINC	1	842	36.82
lncRNA02419	TCONS_00002419	LINC.XLOC_002380	LINC	1	1197	40.6
lncRNA02420	TCONS_00002420	LINC.XLOC_002381	LINC	1	697	32.42
lncRNA02423	TCONS_00002423	LINC.XLOC_002384	LINC	1	2810	38.68
lncRNA02424	TCONS_00002424	LINC.XLOC_002385	LINC	1	780	37.05
lncRNA02427	TCONS_00002427	LINC.XLOC_002388	LINC	1	872	35.89
lncRNA02428	TCONS_00002428	LINC.XLOC_002389	LINC	1	6063	40.72
lncRNA02431	TCONS_00002431	LINC.XLOC_002392	LINC	1	1026	38.6
lncRNA02433	TCONS_00002433	LINC.XLOC_002394	LINC	1	1261	35.53
lncRNA02434	TCONS_00002434	LINC.XLOC_002395	LINC	1	2205	38.5
lncRNA02439	TCONS_00002439	LINC.XLOC_002400	LINC	1	1793	35.19
lncRNA02443	TCONS_00002443	LINC.XLOC_002404	LINC	1	446	26.68
lncRNA02444	TCONS_00002444	LINC.XLOC_002405	LINC	1	297	47.81
lncRNA02447	TCONS_00002447	LINC.XLOC_002408	LINC	1	992	41.53
lncRNA02448	TCONS_00002448	LINC.XLOC_002409	LINC	1	1323	33.71
lncRNA02461	TCONS_00002461	LINC.XLOC_002422	LINC	1	1750	37.2
lncRNA02465	TCONS_00002465	LINC.XLOC_002426	LINC	1	1000	36
lncRNA02466	TCONS_00002466	LINC.XLOC_002427	LINC	1	2219	36.01
lncRNA02474	TCONS_00002474	LINC.XLOC_002435	LINC	1	1254	39.87
lncRNA02475	TCONS_00002475	LINC.XLOC_002436	LINC	1	3996	36.76
lncRNA02477	TCONS_00002477	LINC.XLOC_002438	LINC	1	1768	37.56
lncRNA02478	TCONS_00002478	LINC.XLOC_002439	LINC	1	2293	36.55
lncRNA02480	TCONS_00002480	LINC.XLOC_002441	LINC	1	1092	38.64
lncRNA02481	TCONS_00002481	LINC.XLOC_002442	LINC	1	2518	39.48
lncRNA02484	TCONS_00002484	LINC.XLOC_002445	LINC	1	2062	39.14
lncRNA02487	TCONS_00002487	LINC.XLOC_002448	LINC	1	1889	39.07
lncRNA02492	TCONS_00002492	LINC.XLOC_002453	LINC	1	1021	32.71
lncRNA02493	TCONS_00002493	LINC.XLOC_002454	LINC	1	1374	38.57
lncRNA02494	TCONS_00002494	LINC.XLOC_002455	LINC	1	878	37.59
lncRNA02495	TCONS_00002495	LINC.XLOC_002456	LINC	1	1634	38.43
lncRNA02501	TCONS_00002501	LINC.XLOC_002462	LINC	1	617	31.12
lncRNA02506	TCONS_00002506	LINC.XLOC_002467	LINC	1	8036	41.33
lncRNA02508	TCONS_00002508	LINC.XLOC_002469	LINC	1	1240	35.81
lncRNA02509	TCONS_00002509	LINC.XLOC_002470	LINC	1	480	31.67
lncRNA02511	TCONS_00002511	LINC.XLOC_002472	LINC	1	845	38.82
lncRNA02513	TCONS_00002513	LINC.XLOC_002474	LINC	1	827	39.18
lncRNA02516	TCONS_00002516	LINC.XLOC_002477	LINC	1	2019	35.76
lncRNA02517	TCONS_00002517	LINC.XLOC_002478	LINC	1	1471	37.87
lncRNA02518	TCONS_00002518	LINC.XLOC_002479	LINC	1	1735	39.25
lncRNA02521	TCONS_00002521	LINC.XLOC_002482	LINC	1	1469	38.12
lncRNA02523	TCONS_00002523	LINC.XLOC_002484	LINC	1	2268	35.85
lncRNA02527	TCONS_00002527	LINC.XLOC_002488	LINC	1	966	37.99
lncRNA02528	TCONS_00002528	LINC.XLOC_002489	LINC	1	672	41.07
lncRNA02532	TCONS_00002532	LINC.XLOC_002493	LINC	1	1994	37.51
lncRNA02534	TCONS_00002534	LINC.XLOC_002495	LINC	1	5173	39.92
lncRNA02535	TCONS_00002535	LINC.XLOC_002496	LINC	1	1642	36.3
lncRNA02536	TCONS_00002536	LINC.XLOC_002497	LINC	1	1191	38.46
lncRNA02537	TCONS_00002537	LINC.XLOC_002498	LINC	1	534	42.88
lncRNA02540	TCONS_00002540	LINC.XLOC_002501	LINC	1	1168	39.47
lncRNA02541	TCONS_00002541	LINC.XLOC_002502	LINC	1	1494	35.14
lncRNA02546	TCONS_00002546	LINC.XLOC_002505	LINC	1	830	36.02
lncRNA02547	TCONS_00002547	LINC.XLOC_002506	LINC	1	2587	35.64
lncRNA02548	TCONS_00002548	LINC.XLOC_002507	LINC	1	673	32.1
lncRNA02551	TCONS_00002551	LINC.XLOC_002510	LINC	1	1950	37.03
lncRNA02552	TCONS_00002552	LINC.XLOC_002511	LINC	1	1346	36.7
lncRNA02554	TCONS_00002554	LINC.XLOC_002513	LINC	1	914	40.81
lncRNA02564	TCONS_00002564	LINC.XLOC_002523	LINC	1	1009	37.96
lncRNA02565	TCONS_00002565	LINC.XLOC_002524	LINC	1	1936	36.26
lncRNA02568	TCONS_00002568	LINC.XLOC_002527	LINC	1	3474	38.2
lncRNA02571	TCONS_00002571	LINC.XLOC_002530	LINC	1	1253	41.74
lncRNA02572	TCONS_00002572	LINC.XLOC_002531	LINC	1	2748	39.96
lncRNA02574	TCONS_00002574	LINC.XLOC_002533	LINC	1	612	34.15
lncRNA02578	TCONS_00002578	LINC.XLOC_002537	LINC	1	753	34.53
lncRNA02581	TCONS_00002581	LINC.XLOC_002540	LINC	1	1323	36.21
lncRNA02588	TCONS_00002588	LINC.XLOC_002547	LINC	1	1361	39.46
lncRNA02594	TCONS_00002594	LINC.XLOC_002553	LINC	1	2269	37.59
lncRNA02596	TCONS_00002596	LINC.XLOC_002555	LINC	1	1645	40.36
lncRNA02598	TCONS_00002598	LINC.XLOC_002557	LINC	1	3505	37.69
lncRNA02601	TCONS_00002601	LINC.XLOC_002560	LINC	1	2390	39.75
lncRNA02602	TCONS_00002602	LINC.XLOC_002561	LINC	1	2272	42.03
lncRNA02603	TCONS_00002603	LINC.XLOC_002562	LINC	1	3168	40.15
lncRNA02605	TCONS_00002605	LINC.XLOC_002564	LINC	1	797	34
lncRNA02606	TCONS_00002606	LINC.XLOC_002565	LINC	1	1845	37.72
lncRNA02610	TCONS_00002610	LINC.XLOC_002569	LINC	1	3105	34.36
lncRNA02614	TCONS_00002614	LINC.XLOC_002573	LINC	1	747	37.48
lncRNA02617	TCONS_00002617	LINC.XLOC_002576	LINC	1	1464	34.63
lncRNA02618	TCONS_00002618	LINC.XLOC_002577	LINC	1	1296	36.11
lncRNA02619	TCONS_00002619	LINC.XLOC_002578	LINC	1	1707	37.32
lncRNA02621	TCONS_00002621	LINC.XLOC_002580	LINC	1	2766	36.26
lncRNA02623	TCONS_00002623	LINC.XLOC_002582	LINC	1	1055	36.02
lncRNA02626	TCONS_00002626	LINC.XLOC_002585	LINC	1	3149	35.09
lncRNA02628	TCONS_00002628	LINC.XLOC_002587	LINC	1	3099	37.75
lncRNA02629	TCONS_00002629	LINC.XLOC_002588	LINC	1	1450	37.17
lncRNA02630	TCONS_00002630	LINC.XLOC_002589	LINC	1	1209	34.41
lncRNA02631	TCONS_00002631	LINC.XLOC_002590	LINC	1	4318	39.49
lncRNA02632	TCONS_00002632	LINC.XLOC_002591	LINC	1	9142	39.44
lncRNA02634	TCONS_00002634	LINC.XLOC_002593	LINC	1	950	38.74
lncRNA02635	TCONS_00002635	LINC.XLOC_002594	LINC	1	484	38.43
lncRNA02642	TCONS_00002642	LINC.XLOC_002601	LINC	1	2516	37.48
lncRNA02651	TCONS_00002651	LINC.XLOC_002610	LINC	1	981	40.47
lncRNA02653	TCONS_00002653	LINC.XLOC_002612	LINC	1	863	37.2
lncRNA02656	TCONS_00002656	LINC.XLOC_002615	LINC	1	1422	41.49
lncRNA02661	TCONS_00002661	LINC.XLOC_002620	LINC	1	853	39.62
lncRNA02665	TCONS_00002665	LINC.XLOC_002624	LINC	1	5016	40.25
lncRNA02667	TCONS_00002667	LINC.XLOC_002626	LINC	1	1437	38.48
lncRNA02675	TCONS_00002675	LINC.XLOC_002634	LINC	1	5659	41.7
lncRNA02679	TCONS_00002679	LINC.XLOC_002638	LINC	1	789	40.05
lncRNA02680	TCONS_00002680	LINC.XLOC_002639	LINC	1	880	32.39
lncRNA02681	TCONS_00002681	LINC.XLOC_002640	LINC	1	2422	36.25
lncRNA02682	TCONS_00002682	LINC.XLOC_002641	LINC	1	654	28.59
lncRNA02691	TCONS_00002691	LINC.XLOC_002648	LINC	1	2267	42.43
lncRNA02697	TCONS_00002697	LINC.XLOC_002654	LINC	1	2040	37.94
lncRNA02698	TCONS_00002698	LINC.XLOC_002655	LINC	1	2810	42.03
lncRNA02702	TCONS_00002702	LINC.XLOC_002659	LINC	1	1201	40.13
lncRNA02704	TCONS_00002704	LINC.XLOC_002661	LINC	1	1704	37.56
lncRNA02712	TCONS_00002712	LINC.XLOC_002669	LINC	1	2048	38.48
lncRNA02713	TCONS_00002713	LINC.XLOC_002670	LINC	1	3324	38.81
lncRNA02714	TCONS_00002714	LINC.XLOC_002671	LINC	1	2171	40.99
lncRNA02716	TCONS_00002716	LINC.XLOC_002673	LINC	1	1060	35.09
lncRNA02717	TCONS_00002717	LINC.XLOC_002674	LINC	1	4867	37.6
lncRNA02720	TCONS_00002720	LINC.XLOC_002677	LINC	1	692	37.43
lncRNA02721	TCONS_00002721	LINC.XLOC_002678	LINC	1	1295	34.29
lncRNA02723	TCONS_00002723	LINC.XLOC_002680	LINC	1	919	36.67
lncRNA02724	TCONS_00002724	LINC.XLOC_002681	LINC	1	1581	37.51
lncRNA02726	TCONS_00002726	LINC.XLOC_002683	LINC	1	1018	32.61
lncRNA02727	TCONS_00002727	LINC.XLOC_002684	LINC	1	764	26.31
lncRNA02734	TCONS_00002734	LINC.XLOC_002691	LINC	1	1753	37.88
lncRNA02735	TCONS_00002735	LINC.XLOC_002692	LINC	1	2489	40.62
lncRNA02737	TCONS_00002737	LINC.XLOC_002694	LINC	1	1900	35.79
lncRNA02751	TCONS_00002751	LINC.XLOC_002706	LINC	1	1651	35.31
lncRNA02752	TCONS_00002752	LINC.XLOC_002707	LINC	1	2520	40
lncRNA02754	TCONS_00002754	LINC.XLOC_002709	LINC	1	1964	38.44
lncRNA02755	TCONS_00002755	LINC.XLOC_002710	LINC	1	1356	38.27
lncRNA02760	TCONS_00002760	LINC.XLOC_002715	LINC	1	5518	41.83
lncRNA02765	TCONS_00002765	LINC.XLOC_002720	LINC	1	656	28.81
lncRNA02767	TCONS_00002767	LINC.XLOC_002722	LINC	1	1742	37.2
lncRNA02769	TCONS_00002769	LINC.XLOC_002724	LINC	1	752	39.1
lncRNA02773	TCONS_00002773	LINC.XLOC_002728	LINC	1	2485	38.55
lncRNA02775	TCONS_00002775	LINC.XLOC_002730	LINC	1	1749	33.85
lncRNA02776	TCONS_00002776	LINC.XLOC_002731	LINC	1	460	38.04
lncRNA02781	TCONS_00002781	LINC.XLOC_002736	LINC	1	676	34.76
lncRNA02782	TCONS_00002782	LINC.XLOC_002737	LINC	2	504	37.3
lncRNA02786	TCONS_00002786	LINC.XLOC_002741	LINC	1	1760	41.82
lncRNA02787	TCONS_00002787	LINC.XLOC_002742	LINC	1	2232	40.86
lncRNA02788	TCONS_00002788	LINC.XLOC_002743	LINC	1	7251	39.54
lncRNA02789	TCONS_00002789	LINC.XLOC_002744	LINC	1	2156	34.23
lncRNA02790	TCONS_00002790	LINC.XLOC_002745	LINC	1	3400	38.91
lncRNA02791	TCONS_00002791	LINC.XLOC_002746	LINC	2	513	42.3
lncRNA02800	TCONS_00002800	LINC.XLOC_002755	LINC	1	678	28.47
lncRNA02802	TCONS_00002802	LINC.XLOC_002756	LINC	4	3922	36.82
lncRNA02801	TCONS_00002801	LINC.XLOC_002756	LINC	4	3849	36.71
lncRNA02806	TCONS_00002806	LINC.XLOC_002756	LINC	3	5223	36.34
lncRNA02805	TCONS_00002805	LINC.XLOC_002756	LINC	3	4012	36.22
lncRNA02804	TCONS_00002804	LINC.XLOC_002756	LINC	3	4413	36.28
lncRNA02803	TCONS_00002803	LINC.XLOC_002756	LINC	2	5443	36.27
lncRNA02811	TCONS_00002811	LINC.XLOC_002761	LINC	1	1075	37.3
lncRNA02814	TCONS_00002814	LINC.XLOC_002764	LINC	1	2371	39.31
lncRNA02818	TCONS_00002818	LINC.XLOC_002768	LINC	1	2627	39.13
lncRNA02819	TCONS_00002819	LINC.XLOC_002769	LINC	1	1434	35.84
lncRNA02820	TCONS_00002820	LINC.XLOC_002770	LINC	1	2670	38.2
lncRNA02822	TCONS_00002822	LINC.XLOC_002772	LINC	1	3847	41.51
lncRNA02823	TCONS_00002823	LINC.XLOC_002773	LINC	1	1204	36.46
lncRNA02826	TCONS_00002826	LINC.XLOC_002776	LINC	1	893	32.7
lncRNA02831	TCONS_00002831	LINC.XLOC_002781	LINC	1	2388	33.04
lncRNA02832	TCONS_00002832	LINC.XLOC_002782	LINC	1	2291	42.99
lncRNA02834	TCONS_00002834	LINC.XLOC_002784	LINC	1	931	35.45
lncRNA02835	TCONS_00002835	LINC.XLOC_002785	LINC	1	1137	36.94
lncRNA02836	TCONS_00002836	LINC.XLOC_002786	LINC	1	2361	37.65
lncRNA02839	TCONS_00002839	LINC.XLOC_002789	LINC	1	1528	40.51
lncRNA02840	TCONS_00002840	LINC.XLOC_002790	LINC	1	1421	38.14
lncRNA02842	TCONS_00002842	LINC.XLOC_002792	LINC	2	3198	39.18
lncRNA02843	TCONS_00002843	LINC.XLOC_002793	LINC	1	1381	35.77
lncRNA02845	TCONS_00002845	LINC.XLOC_002795	LINC	1	2229	41.77
lncRNA02846	TCONS_00002846	LINC.XLOC_002796	LINC	1	1302	38.63
lncRNA02847	TCONS_00002847	LINC.XLOC_002797	LINC	1	1057	31.69
lncRNA02848	TCONS_00002848	LINC.XLOC_002798	LINC	1	9332	40.58
lncRNA02859	TCONS_00002859	LINC.XLOC_002809	LINC	1	2183	38.11
lncRNA02862	TCONS_00002862	LINC.XLOC_002812	LINC	1	980	36.63
lncRNA02865	TCONS_00002865	LINC.XLOC_002815	LINC	1	1618	38.88
lncRNA02870	TCONS_00002870	LINC.XLOC_002820	LINC	1	477	37.95
lncRNA02872	TCONS_00002872	LINC.XLOC_002822	LINC	1	1024	35.84
lncRNA02873	TCONS_00002873	LINC.XLOC_002823	LINC	1	1651	42.1
lncRNA02874	TCONS_00002874	LINC.XLOC_002824	LINC	1	1136	34.95
lncRNA02875	TCONS_00002875	LINC.XLOC_002825	LINC	1	2678	35.96
lncRNA02876	TCONS_00002876	LINC.XLOC_002826	LINC	1	784	38.39
lncRNA02877	TCONS_00002877	LINC.XLOC_002827	LINC	1	1383	36.01
lncRNA02878	TCONS_00002878	LINC.XLOC_002828	LINC	1	2711	41.83
lncRNA02880	TCONS_00002880	LINC.XLOC_002830	LINC	1	1057	36.05
lncRNA02882	TCONS_00002882	LINC.XLOC_002832	LINC	1	1470	40.54
lncRNA02890	TCONS_00002890	LINC.XLOC_002840	LINC	1	1309	38.96
lncRNA02896	TCONS_00002896	LINC.XLOC_002846	LINC	1	3598	39.58
lncRNA02899	TCONS_00002899	LINC.XLOC_002849	LINC	1	3154	36.81
lncRNA02914	TCONS_00002914	LINC.XLOC_002864	LINC	1	1708	32.9
lncRNA02919	TCONS_00002919	LINC.XLOC_002869	LINC	1	797	45.55
lncRNA02920	TCONS_00002920	LINC.XLOC_002870	LINC	1	1486	40.51
lncRNA02922	TCONS_00002922	LINC.XLOC_002872	LINC	2	1021	44.27
lncRNA02923	TCONS_00002923	LINC.XLOC_002872	LINC	2	2394	42.61
lncRNA02924	TCONS_00002924	LINC.XLOC_002873	LINC	1	1933	45.37
lncRNA02925	TCONS_00002925	LINC.XLOC_002874	LINC	1	1421	40.68
lncRNA02928	TCONS_00002928	LINC.XLOC_002877	LINC	1	1269	30.73
lncRNA02930	TCONS_00002930	LINC.XLOC_002879	LINC	1	3703	38.16
lncRNA02932	TCONS_00002932	LINC.XLOC_002881	LINC	1	1514	37.58
lncRNA02936	TCONS_00002936	LINC.XLOC_002885	LINC	1	4542	33.66
lncRNA02937	TCONS_00002937	LINC.XLOC_002886	LINC	1	2435	36.67
lncRNA02938	TCONS_00002938	LINC.XLOC_002887	LINC	1	811	38.96
lncRNA02939	TCONS_00002939	LINC.XLOC_002888	LINC	1	735	35.37
lncRNA02943	TCONS_00002943	LINC.XLOC_002892	LINC	1	814	43.49
lncRNA02944	TCONS_00002944	LINC.XLOC_002893	LINC	1	1228	35.83
lncRNA02947	TCONS_00002947	LINC.XLOC_002896	LINC	1	601	34.28
lncRNA02949	TCONS_00002949	LINC.XLOC_002898	LINC	1	961	35.38
lncRNA02950	TCONS_00002950	LINC.XLOC_002899	LINC	1	1401	36.83
lncRNA02953	TCONS_00002953	LINC.XLOC_002902	LINC	1	3051	36.32
lncRNA02954	TCONS_00002954	LINC.XLOC_002903	LINC	1	2156	39.15
lncRNA02955	TCONS_00002955	LINC.XLOC_002904	LINC	1	1008	34.03
lncRNA02956	TCONS_00002956	LINC.XLOC_002905	LINC	1	780	34.1
lncRNA02957	TCONS_00002957	LINC.XLOC_002906	LINC	1	945	37.25
lncRNA02960	TCONS_00002960	LINC.XLOC_002909	LINC	1	1419	36.36
lncRNA02963	TCONS_00002963	LINC.XLOC_002912	LINC	1	2151	39.7
lncRNA02966	TCONS_00002966	LINC.XLOC_002915	LINC	1	2961	33.37
lncRNA02967	TCONS_00002967	LINC.XLOC_002916	LINC	1	948	42.83
lncRNA02970	TCONS_00002970	LINC.XLOC_002919	LINC	1	2373	37
lncRNA02973	TCONS_00002973	LINC.XLOC_002922	LINC	1	3941	39.05
lncRNA02974	TCONS_00002974	LINC.XLOC_002922	LINC	2	1908	40.78
lncRNA02977	TCONS_00002977	LINC.XLOC_002922	LINC	1	1866	41
lncRNA02976	TCONS_00002976	LINC.XLOC_002924	LINC	1	958	32.67
lncRNA02979	TCONS_00002979	LINC.XLOC_002926	LINC	1	1361	35.56
lncRNA02991	TCONS_00002991	LINC.XLOC_002938	LINC	1	537	30.35
lncRNA02997	TCONS_00002997	LINC.XLOC_002944	LINC	1	5081	38.14
lncRNA02999	TCONS_00002999	LINC.XLOC_002946	LINC	1	955	37.49
lncRNA03000	TCONS_00003000	LINC.XLOC_002947	LINC	1	1162	36.66
lncRNA03004	TCONS_00003004	LINC.XLOC_002951	LINC	2	6135	39.48
lncRNA03005	TCONS_00003005	LINC.XLOC_002952	LINC	1	1315	37.79
lncRNA03009	TCONS_00003009	LINC.XLOC_002956	LINC	1	796	33.29
lncRNA03012	TCONS_00003012	LINC.XLOC_002959	LINC	1	3709	39.04
lncRNA03013	TCONS_00003013	LINC.XLOC_002960	LINC	1	3589	39.48
lncRNA03014	TCONS_00003014	LINC.XLOC_002961	LINC	1	3462	35.82
lncRNA03015	TCONS_00003015	LINC.XLOC_002962	LINC	1	1447	33.79
lncRNA03017	TCONS_00003017	LINC.XLOC_002964	LINC	1	2122	40.25
lncRNA03021	TCONS_00003021	LINC.XLOC_002968	LINC	1	1345	35.91
lncRNA03022	TCONS_00003022	LINC.XLOC_002969	LINC	1	599	39.07
lncRNA03023	TCONS_00003023	LINC.XLOC_002970	LINC	1	1234	36.39
lncRNA03026	TCONS_00003026	LINC.XLOC_002973	LINC	1	1589	36.44
lncRNA03030	TCONS_00003030	LINC.XLOC_002977	LINC	1	485	35.88
lncRNA03033	TCONS_00003033	LINC.XLOC_002980	LINC	1	960	35.1
lncRNA03038	TCONS_00003038	LINC.XLOC_002985	LINC	1	840	40.71
lncRNA03039	TCONS_00003039	LINC.XLOC_002986	LINC	1	1639	37.16
lncRNA03042	TCONS_00003042	LINC.XLOC_002989	LINC	1	972	38.17
lncRNA03048	TCONS_00003048	LINC.XLOC_002995	LINC	1	1295	31.12
lncRNA03049	TCONS_00003049	LINC.XLOC_002996	LINC	1	992	38.91
lncRNA03050	TCONS_00003050	LINC.XLOC_002997	LINC	1	663	35.9
lncRNA03055	TCONS_00003055	LINC.XLOC_003002	LINC	1	1012	34.39
lncRNA03058	TCONS_00003058	LINC.XLOC_003005	LINC	1	1312	35.52
lncRNA03059	TCONS_00003059	LINC.XLOC_003006	LINC	1	2183	36.46
lncRNA03060	TCONS_00003060	LINC.XLOC_003007	LINC	1	2892	41.42
lncRNA03062	TCONS_00003062	LINC.XLOC_003009	LINC	1	1216	37.75
lncRNA03065	TCONS_00003065	LINC.XLOC_003012	LINC	1	2831	35.54
lncRNA03070	TCONS_00003070	LINC.XLOC_003017	LINC	1	449	35.86
lncRNA03073	TCONS_00003073	LINC.XLOC_003020	LINC	1	4580	40.7
lncRNA03075	TCONS_00003075	LINC.XLOC_003022	LINC	1	886	40.07
lncRNA03079	TCONS_00003079	LINC.XLOC_003026	LINC	1	1234	32.9
lncRNA03082	TCONS_00003082	LINC.XLOC_003029	LINC	1	469	29.64
lncRNA03085	TCONS_00003085	LINC.XLOC_003032	LINC	1	2390	38.95
lncRNA03087	TCONS_00003087	LINC.XLOC_003034	LINC	1	334	32.63
lncRNA03089	TCONS_00003089	LINC.XLOC_003036	LINC	1	1493	37.44
lncRNA03093	TCONS_00003093	LINC.XLOC_003040	LINC	1	1625	39.2
lncRNA03094	TCONS_00003094	LINC.XLOC_003041	LINC	1	2886	36.17
lncRNA03096	TCONS_00003096	LINC.XLOC_003043	LINC	1	947	36.64
lncRNA03097	TCONS_00003097	LINC.XLOC_003044	LINC	1	399	31.08
lncRNA03098	TCONS_00003098	LINC.XLOC_003045	LINC	1	857	37.11
lncRNA03099	TCONS_00003099	LINC.XLOC_003046	LINC	1	2608	34.93
lncRNA03100	TCONS_00003100	LINC.XLOC_003047	LINC	1	1963	34.23
lncRNA03103	TCONS_00003103	LINC.XLOC_003050	LINC	1	1219	32.9
lncRNA03104	TCONS_00003104	LINC.XLOC_003051	LINC	1	1423	39.99
lncRNA03106	TCONS_00003106	LINC.XLOC_003053	LINC	1	1459	35.44
lncRNA03109	TCONS_00003109	LINC.XLOC_003056	LINC	1	4588	41.06
lncRNA03110	TCONS_00003110	LINC.XLOC_003057	LINC	1	986	37.63
lncRNA03111	TCONS_00003111	LINC.XLOC_003058	LINC	1	778	37.92
lncRNA03112	TCONS_00003112	LINC.XLOC_003059	LINC	1	1369	39.59
lncRNA03114	TCONS_00003114	LINC.XLOC_003061	LINC	1	951	33.33
lncRNA03116	TCONS_00003116	LINC.XLOC_003063	LINC	1	4564	43.01
lncRNA03118	TCONS_00003118	LINC.XLOC_003065	LINC	1	3280	36.16
lncRNA03122	TCONS_00003122	LINC.XLOC_003069	LINC	1	1634	36.6
lncRNA03123	TCONS_00003123	LINC.XLOC_003070	LINC	1	1650	35.45
lncRNA03126	TCONS_00003126	LINC.XLOC_003073	LINC	1	978	35.28
lncRNA03130	TCONS_00003130	LINC.XLOC_003077	LINC	1	1331	42.75
lncRNA03133	TCONS_00003133	LINC.XLOC_003080	LINC	1	2366	35.04
lncRNA03134	TCONS_00003134	LINC.XLOC_003081	LINC	1	1490	36.44
lncRNA03135	TCONS_00003135	LINC.XLOC_003082	LINC	1	527	31.31
lncRNA03138	TCONS_00003138	LINC.XLOC_003085	LINC	1	2740	41.24
lncRNA03147	TCONS_00003147	LINC.XLOC_003094	LINC	1	893	38.63
lncRNA03152	TCONS_00003152	LINC.XLOC_003099	LINC	1	981	36.19
lncRNA03157	TCONS_00003157	LINC.XLOC_003104	LINC	1	1353	38.06
lncRNA03158	TCONS_00003158	LINC.XLOC_003105	LINC	1	483	28.57
lncRNA03160	TCONS_00003160	LINC.XLOC_003107	LINC	1	3267	41.38
lncRNA03162	TCONS_00003162	LINC.XLOC_003109	LINC	1	691	35.46
lncRNA03163	TCONS_00003163	LINC.XLOC_003110	LINC	1	3517	37.05
lncRNA03165	TCONS_00003165	LINC.XLOC_003112	LINC	1	2316	37.35
lncRNA03166	TCONS_00003166	LINC.XLOC_003113	LINC	1	779	35.56
lncRNA03167	TCONS_00003167	LINC.XLOC_003114	LINC	1	552	30.8
lncRNA03168	TCONS_00003168	LINC.XLOC_003115	LINC	1	2440	39.02
lncRNA03169	TCONS_00003169	LINC.XLOC_003116	LINC	1	7611	38.09
lncRNA03173	TCONS_00003173	LINC.XLOC_003120	LINC	1	1067	35.61
lncRNA03174	TCONS_00003174	LINC.XLOC_003121	LINC	1	2649	32.77
lncRNA03175	TCONS_00003175	LINC.XLOC_003122	LINC	1	856	42.06
lncRNA03178	TCONS_00003178	LINC.XLOC_003125	LINC	1	951	40.59
lncRNA03180	TCONS_00003180	LINC.XLOC_003127	LINC	1	2373	41.89
lncRNA03181	TCONS_00003181	LINC.XLOC_003128	LINC	1	409	28.61
lncRNA03182	TCONS_00003182	LINC.XLOC_003129	LINC	1	2149	37.32
lncRNA03183	TCONS_00003183	LINC.XLOC_003130	LINC	1	1047	37.92
lncRNA03185	TCONS_00003185	LINC.XLOC_003132	LINC	1	2366	33.22
lncRNA03186	TCONS_00003186	LINC.XLOC_003133	LINC	1	574	35.54
lncRNA03189	TCONS_00003189	LINC.XLOC_003136	LINC	1	264	41.67
lncRNA03190	TCONS_00003190	LINC.XLOC_003137	LINC	1	1792	38.06
lncRNA03193	TCONS_00003193	LINC.XLOC_003140	LINC	1	4721	37.15
lncRNA03194	TCONS_00003194	LINC.XLOC_003141	LINC	2	1341	36.69
lncRNA03195	TCONS_00003195	LINC.XLOC_003142	LINC	1	671	35.77
lncRNA03196	TCONS_00003196	LINC.XLOC_003143	LINC	1	979	34.32
lncRNA03198	TCONS_00003198	LINC.XLOC_003145	LINC	1	2187	36.53
lncRNA03202	TCONS_00003202	LINC.XLOC_003149	LINC	1	3152	38.36
lncRNA03205	TCONS_00003205	LINC.XLOC_003152	LINC	1	2094	33.19
lncRNA03206	TCONS_00003206	LINC.XLOC_003153	LINC	1	2443	38.8
lncRNA03209	TCONS_00003209	LINC.XLOC_003156	LINC	1	1029	35.47
lncRNA03213	TCONS_00003213	LINC.XLOC_003160	LINC	1	1995	32.43
lncRNA03219	TCONS_00003219	LINC.XLOC_003166	LINC	1	1304	41.26
lncRNA03220	TCONS_00003220	LINC.XLOC_003167	LINC	1	1628	34.28
lncRNA03233	TCONS_00003233	LINC.XLOC_003180	LINC	1	2693	38.06
lncRNA03235	TCONS_00003235	LINC.XLOC_003182	LINC	1	1138	35.85
lncRNA03240	TCONS_00003240	LINC.XLOC_003187	LINC	1	421	27.08
lncRNA03242	TCONS_00003242	LINC.XLOC_003189	LINC	1	3177	42.18
lncRNA03245	TCONS_00003245	LINC.XLOC_003192	LINC	1	4602	36.11
lncRNA03248	TCONS_00003248	LINC.XLOC_003195	LINC	1	3887	40.67
lncRNA03250	TCONS_00003250	LINC.XLOC_003197	LINC	1	1762	37.06
lncRNA03254	TCONS_00003254	LINC.XLOC_003201	LINC	1	1861	34.34
lncRNA03255	TCONS_00003255	LINC.XLOC_003202	LINC	1	3224	35.58
lncRNA03257	TCONS_00003257	LINC.XLOC_003204	LINC	1	1258	31.88
lncRNA03258	TCONS_00003258	LINC.XLOC_003205	LINC	1	1406	41.96
lncRNA03261	TCONS_00003261	LINC.XLOC_003207	LINC	1	1016	35.24
lncRNA03262	TCONS_00003262	LINC.XLOC_003208	LINC	1	860	37.09
lncRNA03268	TCONS_00003268	LINC.XLOC_003214	LINC	1	1386	38.82
lncRNA03269	TCONS_00003269	LINC.XLOC_003215	LINC	1	884	40.72
lncRNA03271	TCONS_00003271	LINC.XLOC_003217	LINC	1	3126	37.88
lncRNA03273	TCONS_00003273	LINC.XLOC_003219	LINC	1	1079	37.16
lncRNA03275	TCONS_00003275	LINC.XLOC_003221	LINC	2	3836	35.51
lncRNA03277	TCONS_00003277	LINC.XLOC_003223	LINC	1	1636	35.64
lncRNA03278	TCONS_00003278	LINC.XLOC_003223	LINC	2	1440	34.86
lncRNA03281	TCONS_00003281	LINC.XLOC_003226	LINC	1	1246	37.96
lncRNA03283	TCONS_00003283	LINC.XLOC_003228	LINC	1	2194	38.97
lncRNA03284	TCONS_00003284	LINC.XLOC_003229	LINC	1	2007	36.47
lncRNA03286	TCONS_00003286	LINC.XLOC_003231	LINC	1	2969	36.31
lncRNA03288	TCONS_00003288	LINC.XLOC_003233	LINC	1	959	36.08
lncRNA03289	TCONS_00003289	LINC.XLOC_003234	LINC	1	1178	35.57
lncRNA03290	TCONS_00003290	LINC.XLOC_003235	LINC	1	858	33.8
lncRNA03291	TCONS_00003291	LINC.XLOC_003236	LINC	1	846	36.41
lncRNA03294	TCONS_00003294	LINC.XLOC_003239	LINC	1	593	35.58
lncRNA03296	TCONS_00003296	LINC.XLOC_003241	LINC	1	1118	30.5
lncRNA03303	TCONS_00003303	LINC.XLOC_003248	LINC	1	498	27.91
lncRNA03306	TCONS_00003306	LINC.XLOC_003251	LINC	1	2375	36.17
lncRNA03307	TCONS_00003307	LINC.XLOC_003252	LINC	1	2887	38.66
lncRNA03309	TCONS_00003309	LINC.XLOC_003254	LINC	1	1629	31.25
lncRNA03312	TCONS_00003312	LINC.XLOC_003257	LINC	1	356	35.11
lncRNA03318	TCONS_00003318	LINC.XLOC_003263	LINC	1	1142	35.11
lncRNA03320	TCONS_00003320	LINC.XLOC_003265	LINC	1	290	36.9
lncRNA03321	TCONS_00003321	LINC.XLOC_003266	LINC	1	1120	34.64
lncRNA03329	TCONS_00003329	LINC.XLOC_003274	LINC	1	489	33.74
lncRNA03332	TCONS_00003332	LINC.XLOC_003277	LINC	1	616	33.44
lncRNA03333	TCONS_00003333	LINC.XLOC_003278	LINC	1	2371	39.73
lncRNA03339	TCONS_00003339	LINC.XLOC_003284	LINC	1	2066	35.43
lncRNA03340	TCONS_00003340	LINC.XLOC_003285	LINC	1	2355	39.58
lncRNA03341	TCONS_00003341	LINC.XLOC_003286	LINC	1	1960	33.88
lncRNA03342	TCONS_00003342	LINC.XLOC_003287	LINC	1	278	45.32
lncRNA03344	TCONS_00003344	LINC.XLOC_003289	LINC	1	1298	34.82
lncRNA03345	TCONS_00003345	LINC.XLOC_003290	LINC	1	905	29.17
lncRNA03346	TCONS_00003346	LINC.XLOC_003291	LINC	1	2383	39.57
lncRNA03347	TCONS_00003347	LINC.XLOC_003292	LINC	1	481	44.7
lncRNA03348	TCONS_00003348	LINC.XLOC_003293	LINC	1	622	37.62
lncRNA03352	TCONS_00003352	LINC.XLOC_003297	LINC	1	2297	42.01
lncRNA03353	TCONS_00003353	LINC.XLOC_003298	LINC	1	4508	38.55
lncRNA03354	TCONS_00003354	LINC.XLOC_003299	LINC	1	702	34.19
lncRNA03363	TCONS_00003363	LINC.XLOC_003308	LINC	1	1184	36.91
lncRNA03368	TCONS_00003368	LINC.XLOC_003313	LINC	1	505	33.27
lncRNA03369	TCONS_00003369	LINC.XLOC_003314	LINC	1	2275	38.42
lncRNA03370	TCONS_00003370	LINC.XLOC_003315	LINC	1	2117	45.02
lncRNA03371	TCONS_00003371	LINC.XLOC_003316	LINC	1	2443	38.19
lncRNA03373	TCONS_00003373	LINC.XLOC_003318	LINC	1	1713	40.57
lncRNA03376	TCONS_00003376	LINC.XLOC_003321	LINC	1	808	37.75
lncRNA03377	TCONS_00003377	LINC.XLOC_003322	LINC	1	1484	34.97
lncRNA03379	TCONS_00003379	LINC.XLOC_003324	LINC	1	1325	37.21
lncRNA03381	TCONS_00003381	LINC.XLOC_003326	LINC	1	1978	42.47
lncRNA03382	TCONS_00003382	LINC.XLOC_003327	LINC	1	883	36.92
lncRNA03385	TCONS_00003385	LINC.XLOC_003330	LINC	1	1032	36.82
lncRNA03386	TCONS_00003386	LINC.XLOC_003331	LINC	1	1652	41.65
lncRNA03389	TCONS_00003389	LINC.XLOC_003334	LINC	1	1557	35
lncRNA03393	TCONS_00003393	LINC.XLOC_003338	LINC	1	552	27.9
lncRNA03396	TCONS_00003396	LINC.XLOC_003341	LINC	1	3911	41.19
lncRNA03399	TCONS_00003399	LINC.XLOC_003344	LINC	1	3781	37.98
lncRNA03400	TCONS_00003400	LINC.XLOC_003345	LINC	1	1619	41.32
lncRNA03401	TCONS_00003401	LINC.XLOC_003346	LINC	1	1721	41.89
lncRNA03402	TCONS_00003402	LINC.XLOC_003347	LINC	1	1062	38.23
lncRNA03404	TCONS_00003404	LINC.XLOC_003349	LINC	1	1591	39.16
lncRNA03405	TCONS_00003405	LINC.XLOC_003350	LINC	1	1631	35.93
lncRNA03407	TCONS_00003407	LINC.XLOC_003352	LINC	1	970	34.85
lncRNA03409	TCONS_00003409	LINC.XLOC_003354	LINC	1	4175	40.72
lncRNA03410	TCONS_00003410	LINC.XLOC_003355	LINC	1	688	34.3
lncRNA03413	TCONS_00003413	LINC.XLOC_003358	LINC	1	1239	41.81
lncRNA03414	TCONS_00003414	LINC.XLOC_003359	LINC	3	5941	40.3
lncRNA03418	TCONS_00003418	LINC.XLOC_003363	LINC	1	296	39.19
lncRNA03420	TCONS_00003420	LINC.XLOC_003365	LINC	1	532	36.09
lncRNA03421	TCONS_00003421	LINC.XLOC_003366	LINC	1	682	31.82
lncRNA03423	TCONS_00003423	LINC.XLOC_003368	LINC	1	2063	45.42
lncRNA03425	TCONS_00003425	LINC.XLOC_003370	LINC	1	3603	38.72
lncRNA03426	TCONS_00003426	LINC.XLOC_003371	LINC	1	1216	35.03
lncRNA03428	TCONS_00003428	LINC.XLOC_003373	LINC	1	1118	36.49
lncRNA03433	TCONS_00003433	LINC.XLOC_003378	LINC	1	859	37.83
lncRNA03435	TCONS_00003435	LINC.XLOC_003380	LINC	1	1125	37.51
lncRNA03436	TCONS_00003436	LINC.XLOC_003381	LINC	1	1243	36.85
lncRNA03439	TCONS_00003439	LINC.XLOC_003384	LINC	1	872	36.35
lncRNA03441	TCONS_00003441	LINC.XLOC_003386	LINC	1	2674	39.98
lncRNA03442	TCONS_00003442	LINC.XLOC_003387	LINC	1	650	32.92
lncRNA03448	TCONS_00003448	LINC.XLOC_003393	LINC	1	2472	42.39
lncRNA03450	TCONS_00003450	LINC.XLOC_003395	LINC	1	3511	36.94
lncRNA03452	TCONS_00003452	LINC.XLOC_003397	LINC	1	546	34.25
lncRNA03454	TCONS_00003454	LINC.XLOC_003399	LINC	1	1519	37.06
lncRNA03456	TCONS_00003456	LINC.XLOC_003401	LINC	1	2778	41.07
lncRNA03459	TCONS_00003459	LINC.XLOC_003404	LINC	1	1127	36.47
lncRNA03462	TCONS_00003462	LINC.XLOC_003407	LINC	1	1079	36.52
lncRNA03464	TCONS_00003464	LINC.XLOC_003409	LINC	1	1499	38.16
lncRNA03465	TCONS_00003465	LINC.XLOC_003410	LINC	1	5742	39.76
lncRNA03467	TCONS_00003467	LINC.XLOC_003412	LINC	1	2747	43.36
lncRNA03468	TCONS_00003468	LINC.XLOC_003413	LINC	1	3589	44.8
lncRNA03469	TCONS_00003469	LINC.XLOC_003414	LINC	1	2773	37.72
lncRNA03472	TCONS_00003472	LINC.XLOC_003417	LINC	1	2777	39.11
lncRNA03475	TCONS_00003475	LINC.XLOC_003420	LINC	1	1357	35.96
lncRNA03476	TCONS_00003476	LINC.XLOC_003421	LINC	1	2575	35.65
lncRNA03477	TCONS_00003477	LINC.XLOC_003422	LINC	1	1144	39.34
lncRNA03479	TCONS_00003479	LINC.XLOC_003424	LINC	1	1528	38.68
lncRNA03480	TCONS_00003480	LINC.XLOC_003425	LINC	1	1517	34.34
lncRNA03481	TCONS_00003481	LINC.XLOC_003426	LINC	1	3969	38.73
lncRNA03482	TCONS_00003482	LINC.XLOC_003427	LINC	1	2826	39.46
lncRNA03484	TCONS_00003484	LINC.XLOC_003428	LINC	2	2446	40.96
lncRNA03483	TCONS_00003483	LINC.XLOC_003428	LINC	1	3111	39.83
lncRNA03485	TCONS_00003485	LINC.XLOC_003429	LINC	1	779	35.69
lncRNA03487	TCONS_00003487	LINC.XLOC_003431	LINC	1	2437	40.75
lncRNA03488	TCONS_00003488	LINC.XLOC_003432	LINC	1	1442	41.68
lncRNA03489	TCONS_00003489	LINC.XLOC_003433	LINC	1	1181	36.33
lncRNA03491	TCONS_00003491	LINC.XLOC_003435	LINC	1	1412	38.67
lncRNA03493	TCONS_00003493	LINC.XLOC_003437	LINC	1	1051	37.68
lncRNA03497	TCONS_00003497	LINC.XLOC_003441	LINC	1	3177	37.61
lncRNA03499	TCONS_00003499	LINC.XLOC_003443	LINC	1	1052	41.16
lncRNA03501	TCONS_00003501	LINC.XLOC_003445	LINC	1	2216	37.77
lncRNA03503	TCONS_00003503	LINC.XLOC_003447	LINC	1	4027	38.09
lncRNA03504	TCONS_00003504	LINC.XLOC_003448	LINC	1	1926	38.27
lncRNA03509	TCONS_00003509	LINC.XLOC_003453	LINC	1	1435	33.03
lncRNA03510	TCONS_00003510	LINC.XLOC_003454	LINC	1	1555	42.83
lncRNA03512	TCONS_00003512	LINC.XLOC_003456	LINC	1	3902	37.75
lncRNA03513	TCONS_00003513	LINC.XLOC_003457	LINC	1	1052	35.84
lncRNA03516	TCONS_00003516	LINC.XLOC_003460	LINC	1	1046	34.03
lncRNA03521	TCONS_00003521	LINC.XLOC_003465	LINC	2	3391	41.32
lncRNA03522	TCONS_00003522	LINC.XLOC_003466	LINC	1	3540	35.79
lncRNA03523	TCONS_00003523	LINC.XLOC_003467	LINC	1	3292	36.73
lncRNA03525	TCONS_00003525	LINC.XLOC_003469	LINC	1	1300	40.92
lncRNA03529	TCONS_00003529	LINC.XLOC_003473	LINC	1	1697	37.77
lncRNA03531	TCONS_00003531	LINC.XLOC_003475	LINC	1	1252	39.62
lncRNA03533	TCONS_00003533	LINC.XLOC_003477	LINC	1	3938	37.18
lncRNA03536	TCONS_00003536	LINC.XLOC_003480	LINC	1	2497	37.69
lncRNA03537	TCONS_00003537	LINC.XLOC_003481	LINC	1	2046	35.39
lncRNA03541	TCONS_00003541	LINC.XLOC_003485	LINC	1	1886	36.06
lncRNA03542	TCONS_00003542	LINC.XLOC_003486	LINC	1	4210	39.19
lncRNA03544	TCONS_00003544	LINC.XLOC_003488	LINC	1	1344	34.08
lncRNA03545	TCONS_00003545	LINC.XLOC_003489	LINC	1	876	36.42
lncRNA03546	TCONS_00003546	LINC.XLOC_003490	LINC	1	3668	42.26
lncRNA03547	TCONS_00003547	LINC.XLOC_003491	LINC	1	3022	40.01
lncRNA03548	TCONS_00003548	LINC.XLOC_003492	LINC	1	5082	39.67
lncRNA03553	TCONS_00003553	LINC.XLOC_003497	LINC	1	2073	38.11
lncRNA03557	TCONS_00003557	LINC.XLOC_003501	LINC	1	1035	42.32
lncRNA03558	TCONS_00003558	LINC.XLOC_003502	LINC	1	4638	37.95
lncRNA03559	TCONS_00003559	LINC.XLOC_003503	LINC	1	1189	39.87
lncRNA03560	TCONS_00003560	LINC.XLOC_003504	LINC	1	6245	40.64
lncRNA03563	TCONS_00003563	LINC.XLOC_003507	LINC	1	5250	41.81
lncRNA03565	TCONS_00003565	LINC.XLOC_003509	LINC	1	816	29.78
lncRNA03569	TCONS_00003569	LINC.XLOC_003513	LINC	1	2759	37.8
lncRNA03570	TCONS_00003570	LINC.XLOC_003514	LINC	1	320	39.38
lncRNA03571	TCONS_00003571	LINC.XLOC_003515	LINC	1	1636	39.55
lncRNA03574	TCONS_00003574	LINC.XLOC_003518	LINC	1	3790	38.97
lncRNA03575	TCONS_00003575	LINC.XLOC_003519	LINC	1	962	27.13
lncRNA03578	TCONS_00003578	LINC.XLOC_003522	LINC	1	2309	33.82
lncRNA03580	TCONS_00003580	LINC.XLOC_003524	LINC	1	1226	40.54
lncRNA03582	TCONS_00003582	LINC.XLOC_003526	LINC	1	3725	38.77
lncRNA03583	TCONS_00003583	LINC.XLOC_003527	LINC	2	2757	37
lncRNA03584	TCONS_00003584	LINC.XLOC_003528	LINC	1	2760	35.04
lncRNA03585	TCONS_00003585	LINC.XLOC_003529	LINC	1	426	34.04
lncRNA03586	TCONS_00003586	LINC.XLOC_003530	LINC	1	4942	38.43
lncRNA03587	TCONS_00003587	LINC.XLOC_003531	LINC	1	1085	38.43
lncRNA03589	TCONS_00003589	LINC.XLOC_003533	LINC	1	1050	37.24
lncRNA03591	TCONS_00003591	LINC.XLOC_003535	LINC	1	1073	41.66
lncRNA03593	TCONS_00003593	LINC.XLOC_003537	LINC	1	1333	36.16
lncRNA03594	TCONS_00003594	LINC.XLOC_003538	LINC	1	837	35.84
lncRNA03595	TCONS_00003595	LINC.XLOC_003539	LINC	1	835	37.96
lncRNA03596	TCONS_00003596	LINC.XLOC_003540	LINC	1	2461	43.52
lncRNA03597	TCONS_00003597	LINC.XLOC_003541	LINC	1	602	39.7
lncRNA03598	TCONS_00003598	LINC.XLOC_003542	LINC	1	4085	38.02
lncRNA03599	TCONS_00003599	LINC.XLOC_003543	LINC	1	3166	39.23
lncRNA03600	TCONS_00003600	LINC.XLOC_003544	LINC	1	5686	40.84
lncRNA03601	TCONS_00003601	LINC.XLOC_003545	LINC	2	7893	38.82
lncRNA03602	TCONS_00003602	LINC.XLOC_003546	LINC	1	1686	39.86
lncRNA03607	TCONS_00003607	LINC.XLOC_003551	LINC	1	1683	35.41
lncRNA03608	TCONS_00003608	LINC.XLOC_003552	LINC	1	2120	40.9
lncRNA03609	TCONS_00003609	LINC.XLOC_003553	LINC	1	509	31.24
lncRNA03620	TCONS_00003620	LINC.XLOC_003564	LINC	2	2072	33.78
lncRNA03621	TCONS_00003621	LINC.XLOC_003564	LINC	2	1668	32.97
lncRNA03622	TCONS_00003622	LINC.XLOC_003564	LINC	2	623	33.07
lncRNA03623	TCONS_00003623	LINC.XLOC_003564	LINC	3	1097	31.81
lncRNA03625	TCONS_00003625	LINC.XLOC_003564	LINC	4	1806	34.05
lncRNA03624	TCONS_00003624	LINC.XLOC_003564	LINC	3	3098	33.63
lncRNA03628	TCONS_00003628	LINC.XLOC_003564	LINC	2	491	37.47
lncRNA03626	TCONS_00003626	LINC.XLOC_003565	LINC	3	1148	35.37
lncRNA03627	TCONS_00003627	LINC.XLOC_003566	LINC	2	1161	32.73
lncRNA03629	TCONS_00003629	LINC.XLOC_003567	LINC	2	2530	33.36
lncRNA03631	TCONS_00003631	LINC.XLOC_003569	LINC	1	1631	34.09
lncRNA03632	TCONS_00003632	LINC.XLOC_003570	LINC	1	2083	38.07
lncRNA03635	TCONS_00003635	LINC.XLOC_003573	LINC	1	4865	42.67
lncRNA03642	TCONS_00003642	LINC.XLOC_003580	LINC	1	1798	38.65
lncRNA03643	TCONS_00003643	LINC.XLOC_003581	LINC	1	3814	33.69
lncRNA03644	TCONS_00003644	LINC.XLOC_003581	LINC	2	4819	33.58
lncRNA03650	TCONS_00003650	LINC.XLOC_003587	LINC	1	712	32.72
lncRNA03651	TCONS_00003651	LINC.XLOC_003588	LINC	1	761	28.91
lncRNA03653	TCONS_00003653	LINC.XLOC_003590	LINC	1	456	37.06
lncRNA03655	TCONS_00003655	LINC.XLOC_003592	LINC	1	523	38.81
lncRNA03661	TCONS_00003661	LINC.XLOC_003598	LINC	1	2028	33.97
lncRNA03662	TCONS_00003662	LINC.XLOC_003599	LINC	1	2234	42.75
lncRNA03663	TCONS_00003663	LINC.XLOC_003600	LINC	1	357	35.29
lncRNA03664	TCONS_00003664	LINC.XLOC_003601	LINC	1	650	39.54
lncRNA03665	TCONS_00003665	LINC.XLOC_003602	LINC	1	2746	39.66
lncRNA03667	TCONS_00003667	LINC.XLOC_003604	LINC	1	966	41.51
lncRNA03669	TCONS_00003669	LINC.XLOC_003606	LINC	1	2203	39.13
lncRNA03671	TCONS_00003671	LINC.XLOC_003608	LINC	1	1434	37.73
lncRNA03672	TCONS_00003672	LINC.XLOC_003609	LINC	1	1495	39.4
lncRNA03675	TCONS_00003675	LINC.XLOC_003612	LINC	1	1171	38.51
lncRNA03680	TCONS_00003680	LINC.XLOC_003617	LINC	1	1845	37.67
lncRNA03681	TCONS_00003681	LINC.XLOC_003618	LINC	1	1306	37.29
lncRNA03683	TCONS_00003683	LINC.XLOC_003620	LINC	1	3683	42.57
lncRNA03690	TCONS_00003690	LINC.XLOC_003627	LINC	1	2362	40.64
lncRNA03706	TCONS_00003706	LINC.XLOC_003643	LINC	1	2550	39.1
lncRNA03709	TCONS_00003709	LINC.XLOC_003646	LINC	1	2068	36.99
lncRNA03710	TCONS_00003710	LINC.XLOC_003647	LINC	1	3443	37.41
lncRNA03714	TCONS_00003714	LINC.XLOC_003651	LINC	1	4033	36.23
lncRNA03720	TCONS_00003720	LINC.XLOC_003657	LINC	1	663	34.09
lncRNA03721	TCONS_00003721	LINC.XLOC_003658	LINC	1	2527	36.05
lncRNA03723	TCONS_00003723	LINC.XLOC_003660	LINC	1	3373	39.4
lncRNA03725	TCONS_00003725	LINC.XLOC_003662	LINC	3	2017	34.51
lncRNA03726	TCONS_00003726	LINC.XLOC_003663	LINC	1	2353	35.57
lncRNA03730	TCONS_00003730	LINC.XLOC_003667	LINC	1	2263	37.38
lncRNA03743	TCONS_00003743	LINC.XLOC_003680	LINC	1	1042	41.65
lncRNA03752	TCONS_00003752	LINC.XLOC_003689	LINC	1	1744	36.93
lncRNA03753	TCONS_00003753	LINC.XLOC_003690	LINC	1	525	31.62
lncRNA03754	TCONS_00003754	LINC.XLOC_003691	LINC	1	1230	37.8
lncRNA03766	TCONS_00003766	LINC.XLOC_003703	LINC	1	860	38.49
lncRNA03767	TCONS_00003767	LINC.XLOC_003704	LINC	1	2827	36.58
lncRNA03768	TCONS_00003768	LINC.XLOC_003705	LINC	1	1305	43.68
lncRNA03769	TCONS_00003769	LINC.XLOC_003706	LINC	1	1294	43.43
lncRNA03774	TCONS_00003774	LINC.XLOC_003711	LINC	2	655	36.34
lncRNA03775	TCONS_00003775	LINC.XLOC_003711	LINC	2	477	33.96
lncRNA03776	TCONS_00003776	LINC.XLOC_003712	LINC	1	2460	39.84
lncRNA03777	TCONS_00003777	LINC.XLOC_003713	LINC	1	985	39.8
lncRNA03778	TCONS_00003778	LINC.XLOC_003714	LINC	1	1455	39.38
lncRNA03779	TCONS_00003779	LINC.XLOC_003715	LINC	1	826	38.86
lncRNA03781	TCONS_00003781	LINC.XLOC_003717	LINC	1	980	35.92
lncRNA03782	TCONS_00003782	LINC.XLOC_003718	LINC	1	952	35.5
lncRNA03785	TCONS_00003785	LINC.XLOC_003721	LINC	1	1324	40.33
lncRNA03789	TCONS_00003789	LINC.XLOC_003725	LINC	1	1113	31.27
lncRNA03791	TCONS_00003791	LINC.XLOC_003727	LINC	1	1909	38.34
lncRNA03792	TCONS_00003792	LINC.XLOC_003728	LINC	1	1051	35.3
lncRNA03795	TCONS_00003795	LINC.XLOC_003731	LINC	1	3853	36.15
lncRNA03796	TCONS_00003796	LINC.XLOC_003732	LINC	1	5281	42.45
lncRNA03798	TCONS_00003798	LINC.XLOC_003734	LINC	1	744	33.74
lncRNA03801	TCONS_00003801	LINC.XLOC_003737	LINC	1	1482	35.7
lncRNA03802	TCONS_00003802	LINC.XLOC_003738	LINC	1	2654	45.44
lncRNA03804	TCONS_00003804	LINC.XLOC_003740	LINC	2	1126	39.7
lncRNA03805	TCONS_00003805	LINC.XLOC_003741	LINC	1	902	38.91
lncRNA03807	TCONS_00003807	LINC.XLOC_003743	LINC	1	1274	38.15
lncRNA03808	TCONS_00003808	LINC.XLOC_003744	LINC	1	1849	37.37
lncRNA03809	TCONS_00003809	LINC.XLOC_003745	LINC	1	867	36.56
lncRNA03815	TCONS_00003815	LINC.XLOC_003751	LINC	1	1029	40.62
lncRNA03817	TCONS_00003817	LINC.XLOC_003753	LINC	1	1951	38.44
lncRNA03820	TCONS_00003820	LINC.XLOC_003756	LINC	1	3884	37.1
lncRNA03821	TCONS_00003821	LINC.XLOC_003757	LINC	1	1774	37.82
lncRNA03825	TCONS_00003825	LINC.XLOC_003761	LINC	1	6360	38.68
lncRNA03828	TCONS_00003828	LINC.XLOC_003764	LINC	1	2538	35.42
lncRNA03834	TCONS_00003834	LINC.XLOC_003770	LINC	1	9839	40.12
lncRNA03842	TCONS_00003842	LINC.XLOC_003778	LINC	1	716	39.53
lncRNA03844	TCONS_00003844	LINC.XLOC_003780	LINC	1	1060	38.68
lncRNA03847	TCONS_00003847	LINC.XLOC_003783	LINC	1	3668	34.92
lncRNA03848	TCONS_00003848	LINC.XLOC_003784	LINC	1	1251	37.73
lncRNA03849	TCONS_00003849	LINC.XLOC_003785	LINC	1	4016	41.43
lncRNA03850	TCONS_00003850	LINC.XLOC_003786	LINC	2	1563	38.26
lncRNA03852	TCONS_00003852	LINC.XLOC_003788	LINC	1	1155	40.87
lncRNA03853	TCONS_00003853	LINC.XLOC_003789	LINC	1	1143	37.01
lncRNA03855	TCONS_00003855	LINC.XLOC_003791	LINC	1	761	32.46
lncRNA03857	TCONS_00003857	LINC.XLOC_003793	LINC	1	511	26.42
lncRNA03859	TCONS_00003859	LINC.XLOC_003795	LINC	1	899	39.6
lncRNA03864	TCONS_00003864	LINC.XLOC_003800	LINC	1	1292	35.99
lncRNA03866	TCONS_00003866	LINC.XLOC_003802	LINC	1	828	34.54
lncRNA03867	TCONS_00003867	LINC.XLOC_003803	LINC	1	715	33.57
lncRNA03868	TCONS_00003868	LINC.XLOC_003804	LINC	1	1942	35.53
lncRNA03870	TCONS_00003870	LINC.XLOC_003806	LINC	1	1334	35.31
lncRNA03871	TCONS_00003871	LINC.XLOC_003807	LINC	1	885	36.16
lncRNA03873	TCONS_00003873	LINC.XLOC_003809	LINC	1	1820	45.27
lncRNA03878	TCONS_00003878	LINC.XLOC_003814	LINC	1	2196	38.43
lncRNA03879	TCONS_00003879	LINC.XLOC_003815	LINC	1	1151	36.06
lncRNA03881	TCONS_00003881	LINC.XLOC_003817	LINC	1	5794	40.56
lncRNA03882	TCONS_00003882	LINC.XLOC_003818	LINC	1	1131	34.04
lncRNA03884	TCONS_00003884	LINC.XLOC_003820	LINC	1	1788	39.77
lncRNA03890	TCONS_00003890	LINC.XLOC_003826	LINC	1	1443	34.37
lncRNA03899	TCONS_00003899	LINC.XLOC_003835	LINC	1	903	42.97
lncRNA03900	TCONS_00003900	LINC.XLOC_003836	LINC	1	1356	38.5
lncRNA03902	TCONS_00003902	LINC.XLOC_003838	LINC	1	1236	35.6
lncRNA03905	TCONS_00003905	LINC.XLOC_003841	LINC	1	541	50.09
lncRNA03906	TCONS_00003906	LINC.XLOC_003842	LINC	1	2678	36.93
lncRNA03908	TCONS_00003908	LINC.XLOC_003844	LINC	1	1470	39.32
lncRNA03909	TCONS_00003909	LINC.XLOC_003845	LINC	1	2737	38.98
lncRNA03915	TCONS_00003915	LINC.XLOC_003851	LINC	1	1059	38.43
lncRNA03916	TCONS_00003916	LINC.XLOC_003852	LINC	1	985	30.25
lncRNA03918	TCONS_00003918	LINC.XLOC_003854	LINC	1	2633	38.82
lncRNA03924	TCONS_00003924	LINC.XLOC_003860	LINC	1	825	35.52
lncRNA03929	TCONS_00003929	LINC.XLOC_003863	LINC	3	2772	39.25
lncRNA03928	TCONS_00003928	LINC.XLOC_003863	LINC	3	1971	41.15
lncRNA03927	TCONS_00003927	LINC.XLOC_003863	LINC	2	2998	38.83
lncRNA03930	TCONS_00003930	LINC.XLOC_003864	LINC	2	2070	38.12
lncRNA03933	TCONS_00003933	LINC.XLOC_003867	LINC	1	1228	41.69
lncRNA03934	TCONS_00003934	LINC.XLOC_003868	LINC	1	2596	37.9
lncRNA03937	TCONS_00003937	LINC.XLOC_003871	LINC	1	1652	38.56
lncRNA03941	TCONS_00003941	LINC.XLOC_003875	LINC	1	767	30.38
lncRNA03948	TCONS_00003948	LINC.XLOC_003882	LINC	1	204	34.31
lncRNA03949	TCONS_00003949	LINC.XLOC_003883	LINC	1	3782	40.61
lncRNA03950	TCONS_00003950	LINC.XLOC_003884	LINC	1	3093	37.67
lncRNA03952	TCONS_00003952	LINC.XLOC_003886	LINC	1	788	36.04
lncRNA03958	TCONS_00003958	LINC.XLOC_003892	LINC	2	5129	41.22
lncRNA03962	TCONS_00003962	LINC.XLOC_003896	LINC	1	1294	42.35
lncRNA03964	TCONS_00003964	LINC.XLOC_003898	LINC	1	2300	38.74
lncRNA03965	TCONS_00003965	LINC.XLOC_003899	LINC	1	1374	37.55
lncRNA03967	TCONS_00003967	LINC.XLOC_003901	LINC	1	3251	38.82
lncRNA03971	TCONS_00003971	LINC.XLOC_003905	LINC	1	802	39.03
lncRNA03973	TCONS_00003973	LINC.XLOC_003907	LINC	1	1740	42.24
lncRNA03974	TCONS_00003974	LINC.XLOC_003908	LINC	1	4389	42.04
lncRNA03975	TCONS_00003975	LINC.XLOC_003909	LINC	1	3640	37.91
lncRNA03978	TCONS_00003978	LINC.XLOC_003912	LINC	1	2212	41.37
lncRNA03979	TCONS_00003979	LINC.XLOC_003913	LINC	1	2529	41.48
lncRNA03980	TCONS_00003980	LINC.XLOC_003914	LINC	1	2961	36.14
lncRNA03981	TCONS_00003981	LINC.XLOC_003915	LINC	1	725	36.97
lncRNA03984	TCONS_00003984	LINC.XLOC_003918	LINC	1	1558	38
lncRNA03985	TCONS_00003985	LINC.XLOC_003919	LINC	1	1229	35.56
lncRNA03986	TCONS_00003986	LINC.XLOC_003920	LINC	1	1119	39.32
lncRNA03987	TCONS_00003987	LINC.XLOC_003921	LINC	1	883	34.54
lncRNA03988	TCONS_00003988	LINC.XLOC_003922	LINC	1	3484	37.94
lncRNA03989	TCONS_00003989	LINC.XLOC_003923	LINC	1	1755	37.38
lncRNA03993	TCONS_00003993	LINC.XLOC_003927	LINC	1	968	36.88
lncRNA03994	TCONS_00003994	LINC.XLOC_003928	LINC	1	1885	39.1
lncRNA03995	TCONS_00003995	LINC.XLOC_003929	LINC	1	1574	36.72
lncRNA03996	TCONS_00003996	LINC.XLOC_003930	LINC	1	1066	37.34
lncRNA03999	TCONS_00003999	LINC.XLOC_003933	LINC	1	1337	39.94
lncRNA04000	TCONS_00004000	LINC.XLOC_003934	LINC	1	770	38.96
lncRNA04003	TCONS_00004003	LINC.XLOC_003937	LINC	1	3153	37.01
lncRNA04004	TCONS_00004004	LINC.XLOC_003938	LINC	1	931	34.16
lncRNA04005	TCONS_00004005	LINC.XLOC_003939	LINC	1	596	31.04
lncRNA04006	TCONS_00004006	LINC.XLOC_003940	LINC	1	1081	35.15
lncRNA04008	TCONS_00004008	LINC.XLOC_003941	LINC	2	934	45.93
lncRNA04007	TCONS_00004007	LINC.XLOC_003941	LINC	1	1289	43.44
lncRNA04015	TCONS_00004015	LINC.XLOC_003948	LINC	1	1356	32.96
lncRNA04019	TCONS_00004019	LINC.XLOC_003952	LINC	1	2384	34.86
lncRNA04022	TCONS_00004022	LINC.XLOC_003955	LINC	1	5699	42.08
lncRNA04036	TCONS_00004036	LINC.XLOC_003965	LINC	2	944	38.24
lncRNA04035	TCONS_00004035	LINC.XLOC_003965	LINC	2	939	38.23
lncRNA04034	TCONS_00004034	LINC.XLOC_003965	LINC	2	984	37.7
lncRNA04039	TCONS_00004039	LINC.XLOC_003968	LINC	1	1724	38.86
lncRNA04040	TCONS_00004040	LINC.XLOC_003969	LINC	1	1146	34.29
lncRNA04041	TCONS_00004041	LINC.XLOC_003970	LINC	1	2586	37.05
lncRNA04045	TCONS_00004045	LINC.XLOC_003974	LINC	1	5228	36.04
lncRNA04046	TCONS_00004046	LINC.XLOC_003975	LINC	1	1973	38.37
lncRNA04047	TCONS_00004047	LINC.XLOC_003976	LINC	1	3352	37.95
lncRNA04048	TCONS_00004048	LINC.XLOC_003977	LINC	1	1550	35.1
lncRNA04050	TCONS_00004050	LINC.XLOC_003979	LINC	1	909	34.43
lncRNA04051	TCONS_00004051	LINC.XLOC_003980	LINC	1	984	39.84
lncRNA04056	TCONS_00004056	LINC.XLOC_003985	LINC	1	1849	42.56
lncRNA04058	TCONS_00004058	LINC.XLOC_003987	LINC	1	444	31.76
lncRNA04059	TCONS_00004059	LINC.XLOC_003988	LINC	1	1556	32.01
lncRNA04064	TCONS_00004064	LINC.XLOC_003993	LINC	2	3465	44.94
lncRNA04066	TCONS_00004066	LINC.XLOC_003995	LINC	1	2270	36.78
lncRNA04067	TCONS_00004067	LINC.XLOC_003996	LINC	1	1519	35.42
lncRNA04071	TCONS_00004071	LINC.XLOC_004000	LINC	1	1572	39.38
lncRNA04072	TCONS_00004072	LINC.XLOC_004001	LINC	1	514	36.38
lncRNA04073	TCONS_00004073	LINC.XLOC_004002	LINC	1	1196	38.29
lncRNA04074	TCONS_00004074	LINC.XLOC_004003	LINC	1	603	41.79
lncRNA04075	TCONS_00004075	LINC.XLOC_004004	LINC	1	2118	43.58
lncRNA04079	TCONS_00004079	LINC.XLOC_004008	LINC	1	4601	37.32
lncRNA04080	TCONS_00004080	LINC.XLOC_004009	LINC	1	838	37.71
lncRNA04081	TCONS_00004081	LINC.XLOC_004010	LINC	1	6071	41.11
lncRNA04082	TCONS_00004082	LINC.XLOC_004010	LINC	2	6189	40.94
lncRNA04083	TCONS_00004083	LINC.XLOC_004011	LINC	1	516	36.63
lncRNA04084	TCONS_00004084	LINC.XLOC_004012	LINC	1	510	37.84
lncRNA04085	TCONS_00004085	LINC.XLOC_004013	LINC	1	1958	35.9
lncRNA04086	TCONS_00004086	LINC.XLOC_004014	LINC	1	1751	36.15
lncRNA04087	TCONS_00004087	LINC.XLOC_004015	LINC	1	1037	33.27
lncRNA04089	TCONS_00004089	LINC.XLOC_004017	LINC	1	2211	32.75
lncRNA04091	TCONS_00004091	LINC.XLOC_004019	LINC	1	1772	38.37
lncRNA04092	TCONS_00004092	LINC.XLOC_004020	LINC	1	2862	42.38
lncRNA04094	TCONS_00004094	LINC.XLOC_004022	LINC	1	1961	37.17
lncRNA04096	TCONS_00004096	LINC.XLOC_004024	LINC	1	2789	42.13
lncRNA04097	TCONS_00004097	LINC.XLOC_004025	LINC	1	551	40.47
lncRNA04102	TCONS_00004102	LINC.XLOC_004029	LINC	1	1573	37.83
lncRNA04106	TCONS_00004106	LINC.XLOC_004033	LINC	1	1612	34
lncRNA04107	TCONS_00004107	LINC.XLOC_004034	LINC	1	6845	41.94
lncRNA04108	TCONS_00004108	LINC.XLOC_004035	LINC	1	2505	40.6
lncRNA04109	TCONS_00004109	LINC.XLOC_004036	LINC	1	2630	39.43
lncRNA04111	TCONS_00004111	LINC.XLOC_004038	LINC	2	1222	40.1
lncRNA04113	TCONS_00004113	LINC.XLOC_004040	LINC	1	5570	37.9
lncRNA04114	TCONS_00004114	LINC.XLOC_004041	LINC	1	2513	36.93
lncRNA04115	TCONS_00004115	LINC.XLOC_004042	LINC	1	1599	37.15
lncRNA04118	TCONS_00004118	LINC.XLOC_004045	LINC	1	552	34.78
lncRNA04120	TCONS_00004120	LINC.XLOC_004047	LINC	1	1166	39.62
lncRNA04122	TCONS_00004122	LINC.XLOC_004049	LINC	1	1279	44.25
lncRNA04123	TCONS_00004123	LINC.XLOC_004050	LINC	1	1407	38.1
lncRNA04129	TCONS_00004129	LINC.XLOC_004056	LINC	1	579	33.68
lncRNA04135	TCONS_00004135	LINC.XLOC_004062	LINC	2	950	35.58
lncRNA04137	TCONS_00004137	LINC.XLOC_004064	LINC	1	1819	36.89
lncRNA04138	TCONS_00004138	LINC.XLOC_004065	LINC	1	920	37.5
lncRNA04144	TCONS_00004144	LINC.XLOC_004071	LINC	1	931	32.76
lncRNA04145	TCONS_00004145	LINC.XLOC_004072	LINC	1	638	33.39
lncRNA04147	TCONS_00004147	LINC.XLOC_004074	LINC	1	1301	35.82
lncRNA04148	TCONS_00004148	LINC.XLOC_004075	LINC	1	1793	39.71
lncRNA04149	TCONS_00004149	LINC.XLOC_004076	LINC	1	4081	40.85
lncRNA04150	TCONS_00004150	LINC.XLOC_004077	LINC	1	5015	41.91
lncRNA04151	TCONS_00004151	LINC.XLOC_004078	LINC	1	3185	39.09
lncRNA04152	TCONS_00004152	LINC.XLOC_004079	LINC	1	841	36.86
lncRNA04154	TCONS_00004154	LINC.XLOC_004081	LINC	1	646	31.89
lncRNA04159	TCONS_00004159	LINC.XLOC_004085	LINC	1	1207	36.29
lncRNA04160	TCONS_00004160	LINC.XLOC_004086	LINC	2	540	40.19
lncRNA04161	TCONS_00004161	LINC.XLOC_004087	LINC	1	1503	36.13
lncRNA04165	TCONS_00004165	LINC.XLOC_004091	LINC	1	637	35.64
lncRNA04166	TCONS_00004166	LINC.XLOC_004092	LINC	1	955	39.48
lncRNA04167	TCONS_00004167	LINC.XLOC_004093	LINC	1	2580	35.62
lncRNA04168	TCONS_00004168	LINC.XLOC_004094	LINC	1	1659	37.19
lncRNA04169	TCONS_00004169	LINC.XLOC_004095	LINC	1	1084	37.27
lncRNA04170	TCONS_00004170	LINC.XLOC_004096	LINC	1	781	37.13
lncRNA04172	TCONS_00004172	LINC.XLOC_004098	LINC	1	1505	34.82
lncRNA04183	TCONS_00004183	LINC.XLOC_004109	LINC	1	1905	37.59
lncRNA04185	TCONS_00004185	LINC.XLOC_004111	LINC	1	881	31.56
lncRNA04187	TCONS_00004187	LINC.XLOC_004113	LINC	1	4561	40.61
lncRNA04189	TCONS_00004189	LINC.XLOC_004115	LINC	1	3334	39.86
lncRNA04193	TCONS_00004193	LINC.XLOC_004119	LINC	1	936	33.97
lncRNA04195	TCONS_00004195	LINC.XLOC_004121	LINC	1	1499	37.29
lncRNA04196	TCONS_00004196	LINC.XLOC_004122	LINC	1	1386	39.11
lncRNA04199	TCONS_00004199	LINC.XLOC_004125	LINC	1	3810	36.72
lncRNA04202	TCONS_00004202	LINC.XLOC_004128	LINC	1	1696	37.26
lncRNA04203	TCONS_00004203	LINC.XLOC_004129	LINC	1	3232	41.74
lncRNA04204	TCONS_00004204	LINC.XLOC_004130	LINC	1	899	37.82
lncRNA04205	TCONS_00004205	LINC.XLOC_004131	LINC	1	3281	40.9
lncRNA04210	TCONS_00004210	LINC.XLOC_004136	LINC	1	1748	38.67
lncRNA04212	TCONS_00004212	LINC.XLOC_004138	LINC	1	911	37.65
lncRNA04216	TCONS_00004216	LINC.XLOC_004142	LINC	1	1005	36.12
lncRNA04217	TCONS_00004217	LINC.XLOC_004143	LINC	1	4537	38.64
lncRNA04218	TCONS_00004218	LINC.XLOC_004144	LINC	1	2241	36.37
lncRNA04219	TCONS_00004219	LINC.XLOC_004145	LINC	1	2594	41.63
lncRNA04223	TCONS_00004223	LINC.XLOC_004149	LINC	1	1202	32.03
lncRNA04224	TCONS_00004224	LINC.XLOC_004150	LINC	1	3187	40.16
lncRNA04225	TCONS_00004225	LINC.XLOC_004151	LINC	1	3538	36.46
lncRNA04226	TCONS_00004226	LINC.XLOC_004152	LINC	1	4309	40.8
lncRNA04240	TCONS_00004240	LINC.XLOC_004166	LINC	1	1413	34.82
lncRNA04242	TCONS_00004242	LINC.XLOC_004168	LINC	1	1944	30.76
lncRNA04244	TCONS_00004244	LINC.XLOC_004170	LINC	1	1007	35.65
lncRNA04249	TCONS_00004249	LINC.XLOC_004175	LINC	1	5743	33.01
lncRNA04251	TCONS_00004251	LINC.XLOC_004177	LINC	1	871	27.67
lncRNA04253	TCONS_00004253	LINC.XLOC_004179	LINC	1	1766	35.11
lncRNA04254	TCONS_00004254	LINC.XLOC_004180	LINC	1	3418	36.78
lncRNA04257	TCONS_00004257	LINC.XLOC_004183	LINC	1	2371	35.34
lncRNA04258	TCONS_00004258	LINC.XLOC_004184	LINC	1	3611	42.18
lncRNA04260	TCONS_00004260	LINC.XLOC_004186	LINC	1	480	27.92
lncRNA04263	TCONS_00004263	LINC.XLOC_004189	LINC	1	1410	34.96
lncRNA04267	TCONS_00004267	LINC.XLOC_004193	LINC	1	1311	29.44
lncRNA04271	TCONS_00004271	LINC.XLOC_004197	LINC	1	8896	40.7
lncRNA04272	TCONS_00004272	LINC.XLOC_004198	LINC	1	2785	37.7
lncRNA04273	TCONS_00004273	LINC.XLOC_004199	LINC	1	897	33.44
lncRNA04274	TCONS_00004274	LINC.XLOC_004200	LINC	1	3804	35.52
lncRNA04275	TCONS_00004275	LINC.XLOC_004201	LINC	1	4580	37.4
lncRNA04278	TCONS_00004278	LINC.XLOC_004204	LINC	1	1983	38.58
lncRNA04285	TCONS_00004285	LINC.XLOC_004211	LINC	1	6732	40.26
lncRNA04286	TCONS_00004286	LINC.XLOC_004212	LINC	1	1872	39.1
lncRNA04287	TCONS_00004287	LINC.XLOC_004213	LINC	1	1879	36.19
lncRNA04293	TCONS_00004293	LINC.XLOC_004219	LINC	1	579	38.69
lncRNA04295	TCONS_00004295	LINC.XLOC_004221	LINC	1	870	37.01
lncRNA04296	TCONS_00004296	LINC.XLOC_004222	LINC	1	460	38.04
lncRNA04300	TCONS_00004300	LINC.XLOC_004226	LINC	1	4625	34.59
lncRNA04305	TCONS_00004305	LINC.XLOC_004230	LINC	2	3470	34.67
lncRNA04304	TCONS_00004304	LINC.XLOC_004230	LINC	1	3698	34.18
lncRNA04306	TCONS_00004306	LINC.XLOC_004231	LINC	1	858	35.08
lncRNA04313	TCONS_00004313	LINC.XLOC_004238	LINC	1	840	35.24
lncRNA04315	TCONS_00004315	LINC.XLOC_004240	LINC	1	600	33.83
lncRNA04317	TCONS_00004317	LINC.XLOC_004242	LINC	1	527	33.78
lncRNA04321	TCONS_00004321	LINC.XLOC_004246	LINC	1	2138	39.34
lncRNA04325	TCONS_00004325	LINC.XLOC_004250	LINC	1	2236	42.13
lncRNA04326	TCONS_00004326	LINC.XLOC_004251	LINC	1	2635	34.27
lncRNA04330	TCONS_00004330	LINC.XLOC_004255	LINC	1	1359	37.67
lncRNA04336	TCONS_00004336	LINC.XLOC_004261	LINC	1	2080	39.76
lncRNA04340	TCONS_00004340	LINC.XLOC_004265	LINC	1	1026	40.06
lncRNA04341	TCONS_00004341	LINC.XLOC_004266	LINC	1	449	32.07
lncRNA04342	TCONS_00004342	LINC.XLOC_004267	LINC	1	925	35.14
lncRNA04344	TCONS_00004344	LINC.XLOC_004269	LINC	1	5592	40
lncRNA04346	TCONS_00004346	LINC.XLOC_004271	LINC	1	5518	39.96
lncRNA04348	TCONS_00004348	LINC.XLOC_004273	LINC	1	1965	37.4
lncRNA04353	TCONS_00004353	LINC.XLOC_004278	LINC	1	2790	38.6
lncRNA04354	TCONS_00004354	LINC.XLOC_004279	LINC	1	1606	32.81
lncRNA04356	TCONS_00004356	LINC.XLOC_004281	LINC	1	1666	38.06
lncRNA04357	TCONS_00004357	LINC.XLOC_004282	LINC	1	1836	36.06
lncRNA04358	TCONS_00004358	LINC.XLOC_004283	LINC	1	1922	36.89
lncRNA04360	TCONS_00004360	LINC.XLOC_004285	LINC	2	1955	39.59
lncRNA04361	TCONS_00004361	LINC.XLOC_004286	LINC	1	1373	36.13
lncRNA04362	TCONS_00004362	LINC.XLOC_004287	LINC	1	2457	35.29
lncRNA04370	TCONS_00004370	LINC.XLOC_004295	LINC	1	1828	36.43
lncRNA04374	TCONS_00004374	LINC.XLOC_004299	LINC	2	3115	35.15
lncRNA04375	TCONS_00004375	LINC.XLOC_004300	LINC	1	1194	37.27
lncRNA04377	TCONS_00004377	LINC.XLOC_004302	LINC	1	2521	36.61
lncRNA04378	TCONS_00004378	LINC.XLOC_004303	LINC	1	6483	38.53
lncRNA04381	TCONS_00004381	LINC.XLOC_004306	LINC	1	1169	35.84
lncRNA04398	TCONS_00004398	LINC.XLOC_004323	LINC	1	485	37.11
lncRNA04405	TCONS_00004405	LINC.XLOC_004330	LINC	1	695	38.13
lncRNA04410	TCONS_00004410	LINC.XLOC_004335	LINC	1	1504	36.44
lncRNA04411	TCONS_00004411	LINC.XLOC_004336	LINC	1	1516	33.58
lncRNA04412	TCONS_00004412	LINC.XLOC_004337	LINC	1	1551	39.72
lncRNA04419	TCONS_00004419	LINC.XLOC_004344	LINC	1	2115	35.65
lncRNA04421	TCONS_00004421	LINC.XLOC_004346	LINC	1	6147	37.92
lncRNA04423	TCONS_00004423	LINC.XLOC_004348	LINC	1	806	35.11
lncRNA04424	TCONS_00004424	LINC.XLOC_004349	LINC	1	1403	33.64
lncRNA04425	TCONS_00004425	LINC.XLOC_004350	LINC	1	2680	40.11
lncRNA04427	TCONS_00004427	LINC.XLOC_004352	LINC	1	575	32.17
lncRNA04430	TCONS_00004430	LINC.XLOC_004355	LINC	1	772	26.04
lncRNA04439	TCONS_00004439	LINC.XLOC_004364	LINC	1	517	27.47
lncRNA04440	TCONS_00004440	LINC.XLOC_004365	LINC	1	2557	38.17
lncRNA04449	TCONS_00004449	LINC.XLOC_004374	LINC	1	1275	31.14
lncRNA04453	TCONS_00004453	LINC.XLOC_004378	LINC	1	1341	38.85
lncRNA04457	TCONS_00004457	LINC.XLOC_004382	LINC	1	606	27.56
lncRNA04461	TCONS_00004461	LINC.XLOC_004386	LINC	1	1903	37.68
lncRNA04463	TCONS_00004463	LINC.XLOC_004388	LINC	1	1699	36.02
lncRNA04464	TCONS_00004464	LINC.XLOC_004389	LINC	1	1170	35.04
lncRNA04470	TCONS_00004470	LINC.XLOC_004395	LINC	1	1058	35.35
lncRNA04472	TCONS_00004472	LINC.XLOC_004397	LINC	1	1238	32.23
lncRNA04474	TCONS_00004474	LINC.XLOC_004399	LINC	1	464	30.82
lncRNA04480	TCONS_00004480	LINC.XLOC_004405	LINC	1	1857	35.06
lncRNA04481	TCONS_00004481	LINC.XLOC_004406	LINC	1	1485	36.36
lncRNA04483	TCONS_00004483	LINC.XLOC_004408	LINC	1	2992	39.47
lncRNA04484	TCONS_00004484	LINC.XLOC_004409	LINC	1	2929	34.07
lncRNA04487	TCONS_00004487	LINC.XLOC_004412	LINC	1	956	36.61
lncRNA04490	TCONS_00004490	LINC.XLOC_004415	LINC	1	1588	33.69
lncRNA04493	TCONS_00004493	LINC.XLOC_004418	LINC	1	1396	37.89
lncRNA04494	TCONS_00004494	LINC.XLOC_004419	LINC	1	1018	35.36
lncRNA04495	TCONS_00004495	LINC.XLOC_004420	LINC	1	1550	42
lncRNA04497	TCONS_00004497	LINC.XLOC_004422	LINC	1	1801	34.87
lncRNA04498	TCONS_00004498	LINC.XLOC_004423	LINC	1	739	33.02
lncRNA04499	TCONS_00004499	LINC.XLOC_004424	LINC	1	2421	37.79
lncRNA04502	TCONS_00004502	LINC.XLOC_004427	LINC	1	1111	36.72
lncRNA04503	TCONS_00004503	LINC.XLOC_004428	LINC	1	2113	39.61
lncRNA04504	TCONS_00004504	LINC.XLOC_004429	LINC	1	1100	37.09
lncRNA04506	TCONS_00004506	LINC.XLOC_004431	LINC	1	1316	39.51
lncRNA04508	TCONS_00004508	LINC.XLOC_004433	LINC	1	2721	35.61
lncRNA04511	TCONS_00004511	LINC.XLOC_004436	LINC	1	1065	33.62
lncRNA04515	TCONS_00004515	LINC.XLOC_004440	LINC	1	1630	34.85
lncRNA04516	TCONS_00004516	LINC.XLOC_004441	LINC	1	1317	41.46
lncRNA04518	TCONS_00004518	LINC.XLOC_004443	LINC	1	530	26.6
lncRNA04521	TCONS_00004521	LINC.XLOC_004446	LINC	1	1182	41.2
lncRNA04522	TCONS_00004522	LINC.XLOC_004447	LINC	1	1422	39.31
lncRNA04524	TCONS_00004524	LINC.XLOC_004449	LINC	1	2409	39.85
lncRNA04528	TCONS_00004528	LINC.XLOC_004453	LINC	1	1168	34.85
lncRNA04529	TCONS_00004529	LINC.XLOC_004454	LINC	1	1549	34.22
lncRNA04530	TCONS_00004530	LINC.XLOC_004455	LINC	2	1540	29.22
lncRNA04531	TCONS_00004531	LINC.XLOC_004456	LINC	1	684	32.6
lncRNA04532	TCONS_00004532	LINC.XLOC_004457	LINC	1	945	37.35
lncRNA04533	TCONS_00004533	LINC.XLOC_004458	LINC	2	3798	37.94
lncRNA04535	TCONS_00004535	LINC.XLOC_004460	LINC	1	1135	37.89
lncRNA04536	TCONS_00004536	LINC.XLOC_004461	LINC	1	569	32.51
lncRNA04537	TCONS_00004537	LINC.XLOC_004462	LINC	1	8595	35.86
lncRNA04542	TCONS_00004542	LINC.XLOC_004467	LINC	1	303	34.65
lncRNA04543	TCONS_00004543	LINC.XLOC_004468	LINC	1	2397	37.63
lncRNA04544	TCONS_00004544	LINC.XLOC_004469	LINC	1	2921	37.93
lncRNA04546	TCONS_00004546	LINC.XLOC_004471	LINC	1	1510	37.68
lncRNA04547	TCONS_00004547	LINC.XLOC_004472	LINC	1	332	34.04
lncRNA04548	TCONS_00004548	LINC.XLOC_004473	LINC	1	1617	31.29
lncRNA04549	TCONS_00004549	LINC.XLOC_004474	LINC	1	491	30.75
lncRNA04556	TCONS_00004556	LINC.XLOC_004481	LINC	1	4107	36.4
lncRNA04557	TCONS_00004557	LINC.XLOC_004482	LINC	1	2161	37.25
lncRNA04558	TCONS_00004558	LINC.XLOC_004483	LINC	1	1194	35.43
lncRNA04559	TCONS_00004559	LINC.XLOC_004484	LINC	1	1045	37.61
lncRNA04560	TCONS_00004560	LINC.XLOC_004485	LINC	1	477	31.03
lncRNA04562	TCONS_00004562	LINC.XLOC_004487	LINC	1	3835	37.13
lncRNA04563	TCONS_00004563	LINC.XLOC_004488	LINC	1	1221	38.49
lncRNA04569	TCONS_00004569	LINC.XLOC_004494	LINC	1	1732	35.1
lncRNA04572	TCONS_00004572	LINC.XLOC_004497	LINC	1	1261	34.02
lncRNA04573	TCONS_00004573	LINC.XLOC_004498	LINC	1	1848	37.34
lncRNA04574	TCONS_00004574	LINC.XLOC_004499	LINC	1	1544	32.06
lncRNA04577	TCONS_00004577	LINC.XLOC_004502	LINC	1	1654	36.03
lncRNA04580	TCONS_00004580	LINC.XLOC_004505	LINC	1	679	37.26
lncRNA04588	TCONS_00004588	LINC.XLOC_004513	LINC	1	4996	36.51
lncRNA04589	TCONS_00004589	LINC.XLOC_004514	LINC	1	1359	39.37
lncRNA04590	TCONS_00004590	LINC.XLOC_004515	LINC	1	643	38.1
lncRNA04592	TCONS_00004592	LINC.XLOC_004517	LINC	1	566	38.16
lncRNA04593	TCONS_00004593	LINC.XLOC_004518	LINC	1	1192	33.14
lncRNA04594	TCONS_00004594	LINC.XLOC_004519	LINC	1	725	32.14
lncRNA04598	TCONS_00004598	LINC.XLOC_004523	LINC	1	5263	36.61
lncRNA04600	TCONS_00004600	LINC.XLOC_004525	LINC	1	912	36.07
lncRNA04602	TCONS_00004602	LINC.XLOC_004527	LINC	1	1416	37.01
lncRNA04604	TCONS_00004604	LINC.XLOC_004529	LINC	1	2275	38.15
lncRNA04605	TCONS_00004605	LINC.XLOC_004530	LINC	1	477	32.49
lncRNA04608	TCONS_00004608	LINC.XLOC_004531	LINC	3	592	36.82
lncRNA04607	TCONS_00004607	LINC.XLOC_004531	LINC	3	597	36.85
lncRNA04606	TCONS_00004606	LINC.XLOC_004531	LINC	2	838	35.92
lncRNA04609	TCONS_00004609	LINC.XLOC_004532	LINC	1	2462	37.25
lncRNA04614	TCONS_00004614	LINC.XLOC_004537	LINC	1	1947	40.73
lncRNA04616	TCONS_00004616	LINC.XLOC_004539	LINC	1	517	34.43
lncRNA04617	TCONS_00004617	LINC.XLOC_004540	LINC	1	1227	34.39
lncRNA04623	TCONS_00004623	LINC.XLOC_004546	LINC	1	1832	38.21
lncRNA04626	TCONS_00004626	LINC.XLOC_004548	LINC	2	1273	37.16
lncRNA04625	TCONS_00004625	LINC.XLOC_004548	LINC	2	1283	37.18
lncRNA04634	TCONS_00004634	LINC.XLOC_004556	LINC	1	1112	40.47
lncRNA04644	TCONS_00004644	LINC.XLOC_004566	LINC	1	1416	38.21
lncRNA04645	TCONS_00004645	LINC.XLOC_004567	LINC	1	613	34.09
lncRNA04646	TCONS_00004646	LINC.XLOC_004568	LINC	1	1187	39.34
lncRNA04647	TCONS_00004647	LINC.XLOC_004569	LINC	1	2470	36.72
lncRNA04648	TCONS_00004648	LINC.XLOC_004570	LINC	1	1934	35.68
lncRNA04649	TCONS_00004649	LINC.XLOC_004571	LINC	1	1115	33.18
lncRNA04652	TCONS_00004652	LINC.XLOC_004574	LINC	1	1093	34.95
lncRNA04661	TCONS_00004661	LINC.XLOC_004583	LINC	1	466	34.12
lncRNA04663	TCONS_00004663	LINC.XLOC_004585	LINC	1	2955	36.11
lncRNA04664	TCONS_00004664	LINC.XLOC_004586	LINC	1	2237	37.33
lncRNA04667	TCONS_00004667	LINC.XLOC_004589	LINC	1	1202	35.77
lncRNA04668	TCONS_00004668	LINC.XLOC_004590	LINC	1	1552	37.31
lncRNA04671	TCONS_00004671	LINC.XLOC_004593	LINC	1	1637	36.59
lncRNA04673	TCONS_00004673	LINC.XLOC_004595	LINC	1	1254	37.64
lncRNA04676	TCONS_00004676	LINC.XLOC_004598	LINC	1	2968	34.87
lncRNA04684	TCONS_00004684	LINC.XLOC_004606	LINC	2	4236	35.08
lncRNA04685	TCONS_00004685	LINC.XLOC_004607	LINC	1	1712	37.27
lncRNA04686	TCONS_00004686	LINC.XLOC_004608	LINC	1	4952	37.64
lncRNA04697	TCONS_00004697	LINC.XLOC_004619	LINC	1	3299	37.83
lncRNA04698	TCONS_00004698	LINC.XLOC_004620	LINC	1	1633	34.11
lncRNA04700	TCONS_00004700	LINC.XLOC_004622	LINC	1	596	34.56
lncRNA04701	TCONS_00004701	LINC.XLOC_004623	LINC	1	3206	40.11
lncRNA04704	TCONS_00004704	LINC.XLOC_004626	LINC	2	1419	38.34
lncRNA04707	TCONS_00004707	LINC.XLOC_004629	LINC	1	1731	37.2
lncRNA04710	TCONS_00004710	LINC.XLOC_004632	LINC	1	2303	39.86
lncRNA04712	TCONS_00004712	LINC.XLOC_004634	LINC	1	1629	36.46
lncRNA04713	TCONS_00004713	LINC.XLOC_004635	LINC	1	1628	30.53
lncRNA04717	TCONS_00004717	LINC.XLOC_004639	LINC	1	1478	36.54
lncRNA04728	TCONS_00004728	LINC.XLOC_004650	LINC	1	2282	35.89
lncRNA04729	TCONS_00004729	LINC.XLOC_004651	LINC	1	2333	35.96
lncRNA04730	TCONS_00004730	LINC.XLOC_004652	LINC	1	427	37.7
lncRNA04734	TCONS_00004734	LINC.XLOC_004656	LINC	1	3299	39.41
lncRNA04738	TCONS_00004738	LINC.XLOC_004660	LINC	1	393	27.23
lncRNA04739	TCONS_00004739	LINC.XLOC_004661	LINC	1	1826	43.15
lncRNA04743	TCONS_00004743	LINC.XLOC_004665	LINC	1	3410	36.1
lncRNA04744	TCONS_00004744	LINC.XLOC_004666	LINC	1	740	34.86
lncRNA04747	TCONS_00004747	LINC.XLOC_004669	LINC	1	801	36.7
lncRNA04752	TCONS_00004752	LINC.XLOC_004673	LINC	2	4221	37.91
lncRNA04751	TCONS_00004751	LINC.XLOC_004673	LINC	2	4337	37.95
lncRNA04753	TCONS_00004753	LINC.XLOC_004674	LINC	1	1389	37.44
lncRNA04754	TCONS_00004754	LINC.XLOC_004675	LINC	1	1259	33.36
lncRNA04755	TCONS_00004755	LINC.XLOC_004676	LINC	1	1299	36.18
lncRNA04756	TCONS_00004756	LINC.XLOC_004677	LINC	1	1179	41.9
lncRNA04758	TCONS_00004758	LINC.XLOC_004679	LINC	1	1677	34.17
lncRNA04759	TCONS_00004759	LINC.XLOC_004680	LINC	1	677	34.71
lncRNA04761	TCONS_00004761	LINC.XLOC_004682	LINC	1	9129	38.02
lncRNA04762	TCONS_00004762	LINC.XLOC_004683	LINC	1	1102	35.21
lncRNA04768	TCONS_00004768	LINC.XLOC_004689	LINC	1	1096	34.49
lncRNA04772	TCONS_00004772	LINC.XLOC_004693	LINC	1	7226	37.43
lncRNA04773	TCONS_00004773	LINC.XLOC_004694	LINC	1	1355	36.46
lncRNA04775	TCONS_00004775	LINC.XLOC_004696	LINC	1	539	28.57
lncRNA04776	TCONS_00004776	LINC.XLOC_004697	LINC	1	1843	37.28
lncRNA04777	TCONS_00004777	LINC.XLOC_004698	LINC	1	495	38.38
lncRNA04778	TCONS_00004778	LINC.XLOC_004699	LINC	1	1864	33.8
lncRNA04779	TCONS_00004779	LINC.XLOC_004700	LINC	1	796	38.19
lncRNA04780	TCONS_00004780	LINC.XLOC_004701	LINC	1	2933	42.04
lncRNA04781	TCONS_00004781	LINC.XLOC_004702	LINC	1	3943	35.91
lncRNA04782	TCONS_00004782	LINC.XLOC_004703	LINC	3	2597	46.9
lncRNA04783	TCONS_00004783	LINC.XLOC_004703	LINC	3	813	45.63
lncRNA04784	TCONS_00004784	LINC.XLOC_004704	LINC	1	1484	46.02
lncRNA04785	TCONS_00004785	LINC.XLOC_004705	LINC	1	2301	44.07
lncRNA04786	TCONS_00004786	LINC.XLOC_004706	LINC	1	752	34.97
lncRNA04788	TCONS_00004788	LINC.XLOC_004708	LINC	1	1481	41.46
lncRNA04789	TCONS_00004789	LINC.XLOC_004709	LINC	1	2064	40.55
lncRNA04791	TCONS_00004791	LINC.XLOC_004711	LINC	1	2730	36.19
lncRNA04796	TCONS_00004796	LINC.XLOC_004716	LINC	1	4259	41.91
lncRNA04799	TCONS_00004799	LINC.XLOC_004719	LINC	1	2317	41.65
lncRNA04800	TCONS_00004800	LINC.XLOC_004720	LINC	1	4628	40.17
lncRNA04801	TCONS_00004801	LINC.XLOC_004721	LINC	1	1198	37.81
lncRNA04803	TCONS_00004803	LINC.XLOC_004723	LINC	1	1333	37.36
lncRNA04804	TCONS_00004804	LINC.XLOC_004724	LINC	1	515	30.29
lncRNA04811	TCONS_00004811	LINC.XLOC_004731	LINC	1	472	34.32
lncRNA04815	TCONS_00004815	LINC.XLOC_004735	LINC	1	2672	39.48
lncRNA04816	TCONS_00004816	LINC.XLOC_004736	LINC	1	1662	35.98
lncRNA04817	TCONS_00004817	LINC.XLOC_004737	LINC	1	492	32.11
lncRNA04819	TCONS_00004819	LINC.XLOC_004739	LINC	1	705	44.11
lncRNA04823	TCONS_00004823	LINC.XLOC_004743	LINC	1	1657	37.12
lncRNA04834	TCONS_00004834	LINC.XLOC_004752	LINC	2	1691	33.53
lncRNA04835	TCONS_00004835	LINC.XLOC_004753	LINC	1	955	38.74
lncRNA04840	TCONS_00004840	LINC.XLOC_004758	LINC	1	379	42.48
lncRNA04845	TCONS_00004845	LINC.XLOC_004763	LINC	1	2129	37.2
lncRNA04846	TCONS_00004846	LINC.XLOC_004764	LINC	1	850	36.35
lncRNA04857	TCONS_00004857	LINC.XLOC_004772	LINC	2	1572	37.34
lncRNA04858	TCONS_00004858	LINC.XLOC_004773	LINC	1	1714	39.85
lncRNA04864	TCONS_00004864	LINC.XLOC_004779	LINC	1	1002	34.53
lncRNA04865	TCONS_00004865	LINC.XLOC_004780	LINC	1	799	36.92
lncRNA04870	TCONS_00004870	LINC.XLOC_004785	LINC	1	860	32.67
lncRNA04873	TCONS_00004873	LINC.XLOC_004788	LINC	1	896	29.58
lncRNA04875	TCONS_00004875	LINC.XLOC_004790	LINC	1	2289	38.84
lncRNA04887	TCONS_00004887	LINC.XLOC_004802	LINC	1	3055	37.61
lncRNA04888	TCONS_00004888	LINC.XLOC_004803	LINC	1	1580	39.94
lncRNA04893	TCONS_00004893	LINC.XLOC_004808	LINC	1	595	25.71
lncRNA04899	TCONS_00004899	LINC.XLOC_004814	LINC	1	1443	36.87
lncRNA04903	TCONS_00004903	LINC.XLOC_004818	LINC	1	382	35.08
lncRNA04905	TCONS_00004905	LINC.XLOC_004820	LINC	1	1086	36.37
lncRNA04906	TCONS_00004906	LINC.XLOC_004821	LINC	1	746	40.88
lncRNA04910	TCONS_00004910	LINC.XLOC_004825	LINC	1	2563	39.6
lncRNA04911	TCONS_00004911	LINC.XLOC_004826	LINC	1	4125	38.84
lncRNA04914	TCONS_00004914	LINC.XLOC_004829	LINC	1	1035	36.43
lncRNA04916	TCONS_00004916	LINC.XLOC_004831	LINC	1	2469	35.97
lncRNA04917	TCONS_00004917	LINC.XLOC_004831	LINC	2	427	41.45
lncRNA04918	TCONS_00004918	LINC.XLOC_004831	LINC	2	372	40.32
lncRNA04924	TCONS_00004924	LINC.XLOC_004837	LINC	1	2623	38.7
lncRNA04926	TCONS_00004926	LINC.XLOC_004839	LINC	1	2007	35.13
lncRNA04928	TCONS_00004928	LINC.XLOC_004841	LINC	1	644	34.78
lncRNA04929	TCONS_00004929	LINC.XLOC_004842	LINC	1	2370	40.68
lncRNA04930	TCONS_00004930	LINC.XLOC_004843	LINC	1	1907	39.7
lncRNA04931	TCONS_00004931	LINC.XLOC_004844	LINC	1	1308	38.23
lncRNA04934	TCONS_00004934	LINC.XLOC_004847	LINC	2	1343	39.54
lncRNA04940	TCONS_00004940	LINC.XLOC_004853	LINC	1	1740	37.7
lncRNA04944	TCONS_00004944	LINC.XLOC_004857	LINC	1	1027	37.2
lncRNA04945	TCONS_00004945	LINC.XLOC_004858	LINC	1	2169	37.85
lncRNA04946	TCONS_00004946	LINC.XLOC_004859	LINC	1	2215	34.27
lncRNA04949	TCONS_00004949	LINC.XLOC_004862	LINC	1	1563	35.96
lncRNA04951	TCONS_00004951	LINC.XLOC_004864	LINC	1	1419	37.7
lncRNA04953	TCONS_00004953	LINC.XLOC_004866	LINC	1	1919	38.09
lncRNA04958	TCONS_00004958	LINC.XLOC_004871	LINC	1	1694	37.01
lncRNA04960	TCONS_00004960	LINC.XLOC_004873	LINC	1	1045	36.94
lncRNA04964	TCONS_00004964	LINC.XLOC_004877	LINC	1	1169	37.9
lncRNA04966	TCONS_00004966	LINC.XLOC_004879	LINC	1	998	34.97
lncRNA04969	TCONS_00004969	LINC.XLOC_004882	LINC	1	1570	34.39
lncRNA04971	TCONS_00004971	LINC.XLOC_004884	LINC	1	4755	34.2
lncRNA04972	TCONS_00004972	LINC.XLOC_004885	LINC	1	1008	37
lncRNA04974	TCONS_00004974	LINC.XLOC_004887	LINC	1	1472	35.05
lncRNA04975	TCONS_00004975	LINC.XLOC_004888	LINC	1	772	32.64
lncRNA04976	TCONS_00004976	LINC.XLOC_004889	LINC	1	659	33.99
lncRNA04985	TCONS_00004985	LINC.XLOC_004898	LINC	1	2583	38.44
lncRNA04991	TCONS_00004991	LINC.XLOC_004904	LINC	1	963	37.49
lncRNA04992	TCONS_00004992	LINC.XLOC_004905	LINC	1	2404	37.1
lncRNA04995	TCONS_00004995	LINC.XLOC_004908	LINC	1	4032	36.81
lncRNA04998	TCONS_00004998	LINC.XLOC_004911	LINC	1	994	39.13
lncRNA05011	TCONS_00005011	LINC.XLOC_004924	LINC	1	1539	36.06
lncRNA05012	TCONS_00005012	LINC.XLOC_004925	LINC	1	458	31.22
lncRNA05016	TCONS_00005016	LINC.XLOC_004929	LINC	1	1438	39.36
lncRNA05023	TCONS_00005023	LINC.XLOC_004936	LINC	1	1893	37.35
lncRNA05025	TCONS_00005025	LINC.XLOC_004938	LINC	1	2514	41.05
lncRNA05027	TCONS_00005027	LINC.XLOC_004940	LINC	1	1554	38.42
lncRNA05028	TCONS_00005028	LINC.XLOC_004941	LINC	1	8018	39.91
lncRNA05033	TCONS_00005033	LINC.XLOC_004946	LINC	1	1977	39.86
lncRNA05035	TCONS_00005035	LINC.XLOC_004948	LINC	1	1406	37.91
lncRNA05036	TCONS_00005036	LINC.XLOC_004949	LINC	1	990	37.58
lncRNA05041	TCONS_00005041	LINC.XLOC_004954	LINC	1	954	35.43
lncRNA05043	TCONS_00005043	LINC.XLOC_004956	LINC	1	695	33.53
lncRNA05045	TCONS_00005045	LINC.XLOC_004958	LINC	1	394	39.09
lncRNA05046	TCONS_00005046	LINC.XLOC_004959	LINC	1	1332	39.86
lncRNA05051	TCONS_00005051	LINC.XLOC_004964	LINC	1	696	37.79
lncRNA05058	TCONS_00005058	LINC.XLOC_004971	LINC	1	1344	39.73
lncRNA05060	TCONS_00005060	LINC.XLOC_004973	LINC	1	1007	36.05
lncRNA05065	TCONS_00005065	LINC.XLOC_004978	LINC	1	643	33.59
lncRNA05066	TCONS_00005066	LINC.XLOC_004979	LINC	1	833	40.82
lncRNA05068	TCONS_00005068	LINC.XLOC_004981	LINC	1	1200	40.83
lncRNA05071	TCONS_00005071	LINC.XLOC_004984	LINC	1	3263	37.57
lncRNA05072	TCONS_00005072	LINC.XLOC_004985	LINC	1	2349	35.5
lncRNA05075	TCONS_00005075	LINC.XLOC_004988	LINC	1	353	30.88
lncRNA05079	TCONS_00005079	LINC.XLOC_004992	LINC	1	1462	38.85
lncRNA05080	TCONS_00005080	LINC.XLOC_004993	LINC	1	3204	42.13
lncRNA05082	TCONS_00005082	LINC.XLOC_004995	LINC	1	1830	41.31
lncRNA05083	TCONS_00005083	LINC.XLOC_004996	LINC	1	1153	41.2
lncRNA05091	TCONS_00005091	LINC.XLOC_005004	LINC	1	1036	41.22
lncRNA05097	TCONS_00005097	LINC.XLOC_005010	LINC	2	2691	37.42
lncRNA05100	TCONS_00005100	LINC.XLOC_005013	LINC	1	743	33.78
lncRNA05106	TCONS_00005106	LINC.XLOC_005019	LINC	1	893	36.62
lncRNA05109	TCONS_00005109	LINC.XLOC_005022	LINC	1	6855	41.24
lncRNA05110	TCONS_00005110	LINC.XLOC_005023	LINC	1	685	32.41
lncRNA05116	TCONS_00005116	LINC.XLOC_005029	LINC	1	1350	40.96
lncRNA05119	TCONS_00005119	LINC.XLOC_005032	LINC	1	2675	40.26
lncRNA05123	TCONS_00005123	LINC.XLOC_005036	LINC	1	706	28.05
lncRNA05124	TCONS_00005124	LINC.XLOC_005037	LINC	1	848	39.39
lncRNA05126	TCONS_00005126	LINC.XLOC_005039	LINC	1	1418	33.78
lncRNA05130	TCONS_00005130	LINC.XLOC_005043	LINC	1	684	33.77
lncRNA05131	TCONS_00005131	LINC.XLOC_005044	LINC	1	3925	37.55
lncRNA05136	TCONS_00005136	LINC.XLOC_005049	LINC	1	1599	39.4
lncRNA05137	TCONS_00005137	LINC.XLOC_005050	LINC	1	1347	36.82
lncRNA05140	TCONS_00005140	LINC.XLOC_005053	LINC	1	5110	35.77
lncRNA05143	TCONS_00005143	LINC.XLOC_005056	LINC	1	1240	40
lncRNA05144	TCONS_00005144	LINC.XLOC_005057	LINC	1	1806	36.38
lncRNA05149	TCONS_00005149	LINC.XLOC_005062	LINC	1	701	34.66
lncRNA05151	TCONS_00005151	LINC.XLOC_005064	LINC	1	1084	36.81
lncRNA05158	TCONS_00005158	LINC.XLOC_005071	LINC	1	4283	38.03
lncRNA05160	TCONS_00005160	LINC.XLOC_005073	LINC	1	1978	39.43
lncRNA05165	TCONS_00005165	LINC.XLOC_005078	LINC	1	919	34.06
lncRNA05168	TCONS_00005168	LINC.XLOC_005081	LINC	1	1651	38.52
lncRNA05171	TCONS_00005171	LINC.XLOC_005084	LINC	1	767	41.33
lncRNA05179	TCONS_00005179	LINC.XLOC_005092	LINC	1	1138	34.62
lncRNA05184	TCONS_00005184	LINC.XLOC_005097	LINC	1	3320	37.41
lncRNA05185	TCONS_00005185	LINC.XLOC_005098	LINC	1	831	29.72
lncRNA05186	TCONS_00005186	LINC.XLOC_005099	LINC	1	454	36.78
lncRNA05187	TCONS_00005187	LINC.XLOC_005100	LINC	1	559	37.39
lncRNA05189	TCONS_00005189	LINC.XLOC_005102	LINC	1	1255	43.19
lncRNA05192	TCONS_00005192	LINC.XLOC_005105	LINC	1	3047	30.06
lncRNA05197	TCONS_00005197	LINC.XLOC_005110	LINC	1	1384	40.17
lncRNA05201	TCONS_00005201	LINC.XLOC_005114	LINC	1	1073	34.95
lncRNA05202	TCONS_00005202	LINC.XLOC_005115	LINC	1	2045	40.29
lncRNA05204	TCONS_00005204	LINC.XLOC_005117	LINC	1	562	37.19
lncRNA05208	TCONS_00005208	LINC.XLOC_005121	LINC	1	2109	43.1
lncRNA05220	TCONS_00005220	LINC.XLOC_005133	LINC	1	774	36.69
lncRNA05227	TCONS_00005227	LINC.XLOC_005139	LINC	1	573	35.78
lncRNA05229	TCONS_00005229	LINC.XLOC_005141	LINC	1	1754	38.31
lncRNA05230	TCONS_00005230	LINC.XLOC_005142	LINC	1	1437	34.1
lncRNA05236	TCONS_00005236	LINC.XLOC_005147	LINC	1	1567	40.33
lncRNA05239	TCONS_00005239	LINC.XLOC_005150	LINC	1	551	34.66
lncRNA05246	TCONS_00005246	LINC.XLOC_005157	LINC	1	1282	39.16
lncRNA05247	TCONS_00005247	LINC.XLOC_005158	LINC	1	1453	35.72
lncRNA05254	TCONS_00005254	LINC.XLOC_005165	LINC	1	1161	39.53
lncRNA05255	TCONS_00005255	LINC.XLOC_005166	LINC	1	1892	35.25
lncRNA05258	TCONS_00005258	LINC.XLOC_005169	LINC	1	1076	33.92
lncRNA05269	TCONS_00005269	LINC.XLOC_005180	LINC	1	4340	39.56
lncRNA05275	TCONS_00005275	LINC.XLOC_005185	LINC	1	2832	36.72
lncRNA05277	TCONS_00005277	LINC.XLOC_005187	LINC	1	515	31.46
lncRNA05289	TCONS_00005289	LINC.XLOC_005199	LINC	1	695	35.54
lncRNA05292	TCONS_00005292	LINC.XLOC_005202	LINC	1	1775	35.55
lncRNA05293	TCONS_00005293	LINC.XLOC_005203	LINC	1	1071	40.34
lncRNA05295	TCONS_00005295	LINC.XLOC_005205	LINC	1	4073	35.33
lncRNA05297	TCONS_00005297	LINC.XLOC_005207	LINC	1	520	29.42
lncRNA05299	TCONS_00005299	LINC.XLOC_005209	LINC	1	873	37.46
lncRNA05305	TCONS_00005305	LINC.XLOC_005215	LINC	1	1871	37.36
lncRNA05307	TCONS_00005307	LINC.XLOC_005217	LINC	1	632	38.45
lncRNA05308	TCONS_00005308	LINC.XLOC_005218	LINC	1	1610	37.83
lncRNA05312	TCONS_00005312	LINC.XLOC_005221	LINC	1	2565	37.82
lncRNA05318	TCONS_00005318	LINC.XLOC_005227	LINC	1	2324	36.27
lncRNA05319	TCONS_00005319	LINC.XLOC_005228	LINC	1	7095	40.63
lncRNA05320	TCONS_00005320	LINC.XLOC_005229	LINC	1	841	40.07
lncRNA05322	TCONS_00005322	LINC.XLOC_005231	LINC	1	1424	37.08
lncRNA05323	TCONS_00005323	LINC.XLOC_005232	LINC	1	1841	39.98
lncRNA05324	TCONS_00005324	LINC.XLOC_005233	LINC	1	467	30.41
lncRNA05329	TCONS_00005329	LINC.XLOC_005238	LINC	2	2413	36.1
lncRNA05335	TCONS_00005335	LINC.XLOC_005244	LINC	1	1018	36.25
lncRNA05336	TCONS_00005336	LINC.XLOC_005245	LINC	1	1354	33.16
lncRNA05340	TCONS_00005340	LINC.XLOC_005249	LINC	1	543	33.33
lncRNA05341	TCONS_00005341	LINC.XLOC_005250	LINC	1	3093	38.54
lncRNA05345	TCONS_00005345	LINC.XLOC_005252	LINC	1	3213	39
lncRNA05347	TCONS_00005347	LINC.XLOC_005253	LINC	1	2048	42.77
lncRNA05348	TCONS_00005348	LINC.XLOC_005254	LINC	1	2312	37.59
lncRNA05370	TCONS_00005370	LINC.XLOC_005276	LINC	1	1766	38.62
lncRNA05372	TCONS_00005372	LINC.XLOC_005278	LINC	1	698	39.4
lncRNA05374	TCONS_00005374	LINC.XLOC_005280	LINC	1	678	28.91
lncRNA05380	TCONS_00005380	LINC.XLOC_005286	LINC	1	3721	41.49
lncRNA05381	TCONS_00005381	LINC.XLOC_005287	LINC	1	1318	35.36
lncRNA05399	TCONS_00005399	LINC.XLOC_005305	LINC	1	2130	38.26
lncRNA05400	TCONS_00005400	LINC.XLOC_005306	LINC	1	2901	35.23
lncRNA05401	TCONS_00005401	LINC.XLOC_005307	LINC	1	1100	35.18
lncRNA05402	TCONS_00005402	LINC.XLOC_005308	LINC	1	1337	42.78
lncRNA05410	TCONS_00005410	LINC.XLOC_005315	LINC	1	795	40
lncRNA05411	TCONS_00005411	LINC.XLOC_005316	LINC	1	1855	34.93
lncRNA05412	TCONS_00005412	LINC.XLOC_005317	LINC	1	1389	37.08
lncRNA05418	TCONS_00005418	LINC.XLOC_005323	LINC	1	1338	41.85
lncRNA05425	TCONS_00005425	LINC.XLOC_005330	LINC	1	1081	35.25
lncRNA05426	TCONS_00005426	LINC.XLOC_005331	LINC	1	679	39.62
lncRNA05427	TCONS_00005427	LINC.XLOC_005332	LINC	1	958	35.8
lncRNA05429	TCONS_00005429	LINC.XLOC_005334	LINC	1	1577	39.19
lncRNA05432	TCONS_00005432	LINC.XLOC_005336	LINC	1	932	37.98
lncRNA05435	TCONS_00005435	LINC.XLOC_005339	LINC	1	1281	34.74
lncRNA05441	TCONS_00005441	LINC.XLOC_005345	LINC	1	1201	36.47
lncRNA05442	TCONS_00005442	LINC.XLOC_005346	LINC	1	1387	38.36
lncRNA05450	TCONS_00005450	LINC.XLOC_005354	LINC	1	6760	57.47
lncRNA05455	TCONS_00005455	LINC.XLOC_005359	LINC	1	1516	36.35
lncRNA05456	TCONS_00005456	LINC.XLOC_005360	LINC	1	747	36.28
lncRNA05467	TCONS_00005467	LINC.XLOC_005371	LINC	1	1264	31.57
lncRNA05468	TCONS_00005468	LINC.XLOC_005372	LINC	1	986	38.74
lncRNA05470	TCONS_00005470	LINC.XLOC_005374	LINC	1	1049	36.89
lncRNA05471	TCONS_00005471	LINC.XLOC_005375	LINC	1	1012	37.94
lncRNA05474	TCONS_00005474	LINC.XLOC_005378	LINC	1	1481	39.5
lncRNA05479	TCONS_00005479	LINC.XLOC_005383	LINC	1	511	34.44
lncRNA05481	TCONS_00005481	LINC.XLOC_005385	LINC	1	1710	35.85
lncRNA05488	TCONS_00005488	LINC.XLOC_005392	LINC	1	517	41.01
lncRNA05489	TCONS_00005489	LINC.XLOC_005393	LINC	1	1086	40.88
lncRNA05492	TCONS_00005492	LINC.XLOC_005396	LINC	1	965	31.3
lncRNA05499	TCONS_00005499	LINC.XLOC_005403	LINC	1	1742	41.04
lncRNA05501	TCONS_00005501	LINC.XLOC_005405	LINC	1	724	31.63
lncRNA05502	TCONS_00005502	LINC.XLOC_005406	LINC	2	2652	35.67
lncRNA05503	TCONS_00005503	LINC.XLOC_005407	LINC	1	866	32.68
[truncated: 23,615 more rows]
